# Supplementary material for: Gestational diabetes mellitus and offspring’s carotid intima–media thickness at birth: MySweetHeart Cohort study
Source: PubMed Central journal article supplement (PMC9330339; doi:10.1136/bmjopen-2022-061649), 2022-07-26
Supplement: bmjopen-2022-061649.draft_revisions.pdf [file bmjopen-2022-061649.draft_revisions.pdf]

# BMJ Open

BMJ Open is committed to open peer review. As part of this commitment we make the peer review history of every article we publish publicly available.

When an article is published we post the peer reviewers' comments and the authors' responses online. We also post the versions of the paper that were used during peer review. These are the versions that the peer review comments apply to.

The versions of the paper that follow are the versions that were submitted during the peer review process. They are not the versions of record or the final published versions. They should not be cited or distributed as the published version of this manuscript.

BMJ Open is an open access journal and the full, final, typeset and author-corrected version of record of the manuscript is available on our site with no access controls, subscription charges or pay-per-view fees (<http://bmjopen.bmj.com>).

If you have any questions on BMJ Open's open peer review process please email [info.bmjopen@bmj.com](mailto:info.bmjopen@bmj.com)

# BMJ Open

## Gestational diabetes mellitus and offspring's carotid intima-media thickness at birth: MySweetHeart Cohort Study

|                               |                                                                                                                                                                                                                                                                                                                                                                                                                                                                                                                                                                                                                                                                                                                                                                                                                       |
|-------------------------------|-----------------------------------------------------------------------------------------------------------------------------------------------------------------------------------------------------------------------------------------------------------------------------------------------------------------------------------------------------------------------------------------------------------------------------------------------------------------------------------------------------------------------------------------------------------------------------------------------------------------------------------------------------------------------------------------------------------------------------------------------------------------------------------------------------------------------|
| Journal:                      | <i>BMJ Open</i>                                                                                                                                                                                                                                                                                                                                                                                                                                                                                                                                                                                                                                                                                                                                                                                                       |
| Manuscript ID                 | bmjopen-2022-061649                                                                                                                                                                                                                                                                                                                                                                                                                                                                                                                                                                                                                                                                                                                                                                                                   |
| Article Type:                 | Original research                                                                                                                                                                                                                                                                                                                                                                                                                                                                                                                                                                                                                                                                                                                                                                                                     |
| Date Submitted by the Author: | 31-Jan-2022                                                                                                                                                                                                                                                                                                                                                                                                                                                                                                                                                                                                                                                                                                                                                                                                           |
| Complete List of Authors:     | Epure, Adina Mihaela; University of Fribourg, Population Health Laboratory; University of Lausanne, Center for Primary Care and Public Health, Department of Epidemiology and Health Services<br>Di Bernardo, Stefano; Lausanne University Hospital, Paediatric Cardiology Unit, Department Woman-Mother-Child<br>Mivelaz, Yvan; Lausanne University Hospital, Paediatric Cardiology Unit, Department Woman-Mother-Child<br>Estoppey Younes, Sandrine; University of Lausanne, Center for Primary Care and Public Health, Department of Epidemiology and Health Services<br>Chiolero, Arnaud; University of Fribourg, Population Health Laboratory; University of Bern, Institute of Primary Health Care<br>Sekarski, Nicole; Lausanne University Hospital, Paediatric Cardiology Unit, Woman-Mother-Child Department |
| Keywords:                     | Cardiovascular imaging < RADIOLOGY & IMAGING, Paediatric cardiology < CARDIOLOGY, Diabetes in pregnancy < DIABETES & ENDOCRINOLOGY, NEONATOLOGY, Cardiac Epidemiology < RADIOLOGY                                                                                                                                                                                                                                                                                                                                                                                                                                                                                                                                                                                                                                     |
|                               |                                                                                                                                                                                                                                                                                                                                                                                                                                                                                                                                                                                                                                                                                                                                                                                                                       |

SCHOLARONE™  
Manuscripts

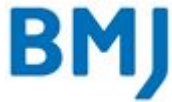

I, the Submitting Author has the right to grant and does grant on behalf of all authors of the Work (as defined in the below author licence), an exclusive licence and/or a non-exclusive licence for contributions from authors who are: i) UK Crown employees; ii) where BMJ has agreed a CC-BY licence shall apply, and/or iii) in accordance with the terms applicable for US Federal Government officers or employees acting as part of their official duties; on a worldwide, perpetual, irrevocable, royalty-free basis to BMJ Publishing Group Ltd ("BMJ") its licensees and where the relevant Journal is co-owned by BMJ to the co-owners of the Journal, to publish the Work in this journal and any other BMJ products and to exploit all rights, as set out in our [licence](#).

The Submitting Author accepts and understands that any supply made under these terms is made by BMJ to the Submitting Author unless you are acting as an employee on behalf of your employer or a postgraduate student of an affiliated institution which is paying any applicable article publishing charge ("APC") for Open Access articles. Where the Submitting Author wishes to make the Work available on an Open Access basis (and intends to pay the relevant APC), the terms of reuse of such Open Access shall be governed by a Creative Commons licence – details of these licences and which [Creative Commons](#) licence will apply to this Work are set out in our licence referred to above.

Other than as permitted in any relevant BMJ Author's Self Archiving Policies, I confirm this Work has not been accepted for publication elsewhere, is not being considered for publication elsewhere and does not duplicate material already published. I confirm all authors consent to publication of this Work and authorise the granting of this licence.

1  
2  
3 1 **Gestational diabetes mellitus and offspring's carotid intima-media thickness at**  
4  
5 2 **birth: *MySweetHeart* Cohort Study**  
6  
7  
8 3

9  
10 4 Adina Mihaela Epure<sup>1,2</sup>, Stefano Di Bernardo<sup>3</sup>, Yvan Mivelaz<sup>3</sup>, Sandrine Estoppey  
11  
12 5 Younes<sup>2</sup>, Arnaud Chiolero<sup>1,4,5¶</sup>, Nicole Sekarski<sup>3¶\*</sup>, on behalf of *MySweetHeart*  
13  
14 6 Research Group  
15  
16  
17 7

18  
19 8 <sup>1</sup>Population Health Laboratory (#PopHealthLab), University of Fribourg, Fribourg,  
20  
21 9 Switzerland;

22  
23  
24 10 <sup>2</sup>Department of Epidemiology and Health Services, Center for Primary Care and Public  
25  
26 11 Health (UNISANTÉ), University of Lausanne, Lausanne, Switzerland;

27  
28 12 <sup>3</sup>Paediatric Cardiology Unit, Woman-Mother-Child Department, Lausanne University  
29  
30 13 Hospital (CHUV), Lausanne, Switzerland;

31  
32  
33 14 <sup>4</sup>Institute of Primary Health Care (BIHAM), University of Bern, Bern, Switzerland;

34  
35 15 <sup>5</sup>School of Global and Population Health, McGill University, Montréal, Canada  
36  
37  
38 16

39  
40 17 ¶ These authors contributed equally to this work.  
41  
42  
43 18

44  
45 19 \* **Corresponding author:** Prof Nicole Sekarski, [nicole.sekarski@chuv.ch](mailto:nicole.sekarski@chuv.ch), Lausanne  
46  
47 20 University Hospital (CHUV), 46 Route du Bugnon, Lausanne, 1011, Switzerland  
48  
49  
50 21

51  
52 22 **Word count** (excluding title page, abstract and article summary, references, figure  
53  
54 23 legends and tables): 2'893  
55  
56  
57  
58  
59  
60

1  
2  
3 24 **ABSTRACT**

4  
5 25 **Objective** Hyperglycemia during pregnancy is associated with cardiometabolic risks  
6  
7 26 for the mother and the offspring. Mothers with gestational diabetes mellitus (GDM)  
8  
9 27 have signs of subclinical atherosclerosis, including increased carotid intima-media  
10  
11 28 thickness (CIMT). We assessed whether GDM is associated with increased CIMT in  
12  
13  
14 29 the offspring at birth.  
15  
16  
17 30

18  
19 31 **Design and setting** *MySweetHeart* Cohort is a prospective cohort study conducted in  
20  
21 32 Switzerland.  
22  
23  
24 33

25  
26 34 **Participants, exposure and outcome measures** This work included pregnant  
27  
28 35 women with and without GDM at 24 to 32 weeks of gestation and their singleton live-  
29  
30 36 born offspring with data on the primary outcome of CIMT. GDM was diagnosed based  
31  
32 37 on the criteria of the International Association of Diabetes and Pregnancy Study  
33  
34 38 Groups. Offspring's CIMT was measured by ultrasonography after birth (range: 1 to 19  
35  
36 39 days).  
37  
38  
39 40

41  
42 41 **Results** Data on CIMT were available for 99 offspring of women without GDM and 101  
43  
44 42 offspring of women with GDM. Maternal age ranged from 18 to 47 years. Some 16%  
45  
46 43 of women with GDM and 6% of women without GDM were obese. Smoking during  
47  
48 44 pregnancy was more frequent among women with GDM (18%) than among those  
49  
50 45 without GDM (4%). Neonatal characteristics were comparable between the 2 groups.  
51  
52 46 The difference in CIMT between offspring of women with and without GDM was of 0.00  
53  
54 47 mm (95% CI: -0.01 to 0.01; p=0.96) and remained similar upon adjustment for potential  
55  
56 48 confounding factors, such as maternal pre-pregnancy BMI, maternal education,  
57  
58  
59  
60

1  
2  
3 49 smoking during pregnancy, family history of diabetes, as well as offspring's sex, age,  
4  
5 50 and body surface area (0.00 mm (95% CI: -0.02 to 0.01; p=0.45)).  
6  
7  
8 51

9  
10 52 **Conclusions** We found no evidence of increased CIMT in neonates exposed to GDM.  
11  
12 53 A longer-term follow-up that includes additional vascular measures, such as  
13  
14 54 endothelial function or arterial stiffness, may shed further light on the cardiovascular  
15  
16 55 health trajectories in children born to mothers with GDM.  
17  
18  
19 56

20  
21 57 **Registration** ClinicalTrials.gov (NCT02872974)  
22  
23  
24 58

25  
26 59 **Keywords** gestational diabetes; carotid intima-media thickness; cardiovascular  
27  
28 60 prevention; child; neonate  
29  
30  
31 61

32  
33 62 **List of abbreviations** BMI, body mass index; CIMT, carotid intima-media thickness;  
34  
35 63 CVD, cardiovascular disease; CHUV, Lausanne University Hospital; DOHaD,  
36  
37 64 developmental origins of health and disease; FPG, fasting plasma glucose; GDM,  
38  
39 65 gestational diabetes mellitus; HbA1c, glycated hemoglobin; IADPSG, International  
40  
41 66 Association of Diabetes and Pregnancy Study Groups; I, intervention; OGTT, oral  
42  
43  
44 67 glucose tolerance test.  
45  
46  
47  
48  
49  
50  
51  
52  
53  
54  
55  
56  
57  
58  
59  
60

1  
2  
3 68 **Strengths and limitations of this study**  
4

- 5 69 • One important strength of this study is represented by its prospective design  
6  
7  
8 70 and the enrollment of participants at the time of gestational diabetes diagnosis.  
9  
10 71 • Carotid intima-media thickness was measured in non-sedated neonates by  
11  
12 72 experienced pediatric cardiologists using automated methods with manual  
13  
14 73 tracing adjustment, in accordance with published guidelines.  
15  
16  
17 74 • Limitations of this study include the relatively small sample size, the possibility  
18  
19 75 of residual confounding and the limited generalizability.  
20  
21  
22  
23  
24  
25  
26  
27  
28  
29  
30  
31  
32  
33  
34  
35  
36  
37  
38  
39  
40  
41  
42  
43  
44  
45  
46  
47  
48  
49  
50  
51  
52  
53  
54  
55  
56  
57  
58  
59  
60

## 76 INTRODUCTION

77 Gestational diabetes mellitus (GDM) is a state of hyperglycemia with onset or first  
78 recognition during pregnancy.[1-3] The prevalence of hyperglycemia during pregnancy  
79 has increased in recent decades, being estimated at 16% worldwide in 2019, with 84%  
80 of cases due to GDM.[4] GDM is associated with long-term metabolic consequences  
81 for both the mother and the offspring, such as type 2 diabetes and obesity.[5] Women  
82 with GDM also have subclinical atherosclerosis and an increased risk for  
83 cardiovascular disease (CVD) later in life.[6,7] However, little is known about the  
84 cardiovascular risk of their offspring.

85  
86 CIMT is a surrogate marker of atherosclerosis, which has been shown to be increased  
87 in children exposed to risk factors in the first 1000 days of life, such as poor fetal  
88 growth,[8] as well as in children with type 1 diabetes.[9] From a developmental origins  
89 of health and disease (DOHaD) perspective,[10] exposure to adverse experiences in  
90 early life may produce lifelong adaptations in the organs' structure and function and  
91 may program the risk for CVD. For instance, a systematic review and meta-analysis  
92 showed that GDM was associated with a higher systolic blood pressure in  
93 childhood.[11] Whether GDM has an impact on children's CIMT is not clearly  
94 established. The evidence is scarce notably in the very young children although CIMT  
95 measurement is feasible from birth and could help discern between changes that occur  
96 before or after birth.[12] To fill this gap, we conducted *MySweetHeart Cohort* study to  
97 assess the early life cardiovascular consequences of GDM.[13] Herein, we evaluated  
98 CIMT at birth in offspring of mothers with and without GDM.

99

100



## 101 **METHODS**

### 102 **Study design and setting**

103 *MySweetHeart Cohort* is a prospective cohort study conducted at the Lausanne  
104 University Hospital (CHUV), Switzerland. The study has been registered with  
105 ClinicalTrials.gov (clinicaltrials.gov/ct2/show/NCT02872974) and the study protocol  
106 has been published.[13] Ethical approval was granted by the Ethics Committee for  
107 Human Research of the Canton de Vaud (study number 2016-00745).

### 109 **Study population**

110 This cohort included pregnant women between 24 and 32 weeks of gestation, with and  
111 without GDM. Other inclusion criteria were age 18 years or more and understanding  
112 French or English. The exclusion criteria were pre-existing diabetes mellitus, strict bed  
113 rest, or severe mental disorders. To facilitate recruitment and share resources, a  
114 collaboration was established with *MySweetHeart Trial*,[14] a randomized controlled  
115 trial assessing the effect of a lifestyle and psychosocial intervention on cardiometabolic  
116 outcomes of women with GDM and their offspring. As such, women with GDM were  
117 invited to contribute to both studies. Participating women with and without GDM were  
118 included in the current analysis if CIMT data for their live-born singleton neonates were  
119 available. All families gave a signed informed consent for use of their data.

### 121 **Data collection**

#### 122 **GDM screening**

123 Pregnant women screened at the prenatal care clinic of the CHUV had a fasting plasma  
124 glucose (FPG) test between 24 and 28 weeks of gestation and GDM was diagnosed if  
125 the test result was  $\geq 5.1$  mmol/L.[13] If FPG was  $< 5.1$  mmol/L, but  $\geq 4.4$  mmol/L,

1  
2  
3 126 women had a 2-hour 75 g oral glucose tolerance test (OGTT) and GDM was diagnosed  
4  
5 127 based on the criteria of the International Association of Diabetes and Pregnancy Study  
6  
7 128 Groups (IADPSG).[15] Pregnant women screened by external obstetricians in the  
8  
9 129 Canton of Vaud underwent the same procedure or directly a 2-hour 75 g OGTT.  
10  
11  
12  
13

130

#### 131 Carotid ultrasound and CIMT measurement

132 A carotid ultrasound assessment was performed between 1 and 7 days of life in the  
133 majority of neonates (n=191). A small share (n=9) had the exam between 8 and 19  
134 days of life due to organizational and logistical constraints. Parents were told to feed  
135 and burp their offspring ahead of the carotid ultrasound to make them more relaxed.  
136 Feeding or administration of a 30% glucose solution were used to comfort the neonates  
137 if they became agitated during the exam. The exam took place in a dark and quiet room  
138 and a cloth was placed under the neonates' shoulders to facilitate the extension of the  
139 neck.  
140

141 Ultrasound image acquisition and analysis were performed by 2 experienced pediatric  
142 cardiologists who were blinded to the maternal glycemic status. Images were acquired  
143 in B-mode with no harmonics, sonoCT, dynamic range of 60dB, at a frame rate of 100-  
144 120Hz, with a depth of 1-2 cm. The right and left carotid arteries were scanned using  
145 a Philips EPIC echocardiograph (Philips Medical, Netherlands) with a L 15-7 MHz high-  
146 resolution linear array transducer, according to the American Heart Association's  
147 recommendations for standard assessment of subclinical atherosclerosis in children  
148 and adolescents.[16] Each observer recorded three consecutive 3-second cine loops  
149 from 2 different angles on each side, which were stored as native DICOM for  
150 subsequent offline analyses (QLab, Philips Medical, Netherlands). Whenever image  
151  
152  
153  
154  
155  
156  
157  
158  
159  
160

1  
2  
3 151 quality was optimal enough, 6 right and 6 left frames were selected and, for each, the  
4  
5 152 maximal IMT of the common carotid artery far wall was measured. Measurements were  
6  
7 153 performed over a 1-cm region of interest proximal to the carotid bulb, on or closest to  
8  
9 154 the R-wave of the electrocardiogram, using a semi-automated edge detection software  
10  
11 155 with manual tracing adjustment when needed. The mean of 12 maximal CIMT  
12  
13 156 measurements was used in the analysis for the majority of neonates (n=170). Two  
14  
15 157 neonates had only one measurement available, whereas the rest had between 2 and  
16  
17 158 11 measurements that were averaged. A good interobserver reliability (coefficient of  
18  
19 159 variation=5.9%) for measurements in non-sedated infants was proven in our laboratory  
20  
21  
22 160 previously.[12]  
23  
24  
25  
26 161

#### 27 28 162 Other sample characteristics

29  
30 163 Data on maternal characteristics (age, country of origin, education, smoking during  
31  
32 164 pregnancy, pre-pregnancy weight and height, or parity) and family history of diabetes  
33  
34 165 were record-based or self-reported by the mother at a researcher-administered  
35  
36 166 interview upon inclusion in the study. Smoking during pregnancy was defined as a  
37  
38 167 mother who was an active tobacco smoker at study baseline, i.e., between 24 and 32  
39  
40 168 weeks of gestation. A maternal blood sampling was also performed at baseline and  
41  
42 169 glycated hemoglobin (HbA1c) was measured. Pre-pregnancy body mass index (BMI)  
43  
44 170 was computed by dividing the pre-pregnancy weight (kg) by the squared height (m<sup>2</sup>).  
45  
46 171 Delivery data such as newborn sex, anthropometry, gestational age, or mode of  
47  
48 172 delivery were obtained from the medical records. Neonatal weight, length and blood  
49  
50 173 pressure were measured by the study team at the time of the carotid ultrasound. Body  
51  
52 174 surface area (m<sup>2</sup>) was computed using the Mosteller equation.[17] One systolic and  
53  
54 175 diastolic blood pressure measurement was taken from the right upper arm, in a supine  
55  
56  
57  
58  
59  
60

1  
2  
3 176 position, using a clinically validated and regularly calibrated oscillometric  
4  
5 177 sphygmomanometer (Accutorr Plus; Datascope, Paramus, New Jersey, USA) with  
6  
7  
8 178 neonate cuffs.  
9

10 179

## 12 180 **Data analysis**

14 181 Descriptive statistics on study participants are reported as percentages (%) or as  
15  
16 182 mean, standard deviation, minimum and maximum values. The relationship of GDM  
17  
18 183 with CIMT was evaluated by a set of linear regression models with and without  
19  
20 184 adjustment for potential confounders, i.e., baseline covariates associated with  
21  
22 185 metabolic and cardiovascular risks, offspring's sex, and anthropometry at CIMT  
23  
24 186 assessment. Potential confounders were maternal pre-pregnancy BMI, maternal  
25  
26 187 education (university/no university), smoking during pregnancy (yes/no), and family  
27  
28 188 history of diabetes (yes/no). The variable family history of diabetes summarized  
29  
30 189 disease occurrence in a 1<sup>st</sup> degree relative of the mother, 1<sup>st</sup> degree relative of the  
31  
32 190 father or in the father himself and assumed missing data in any of these variables as  
33  
34 191 no history of diabetes unless values for all 3 variables were missing. To account for  
35  
36 192 differences in body size,[18,19] we adjusted for body surface area and age at CIMT  
37  
38 193 assessment. All statistical analyses were performed in Stata 16 (Stata Corporation,  
39  
40 194 Texas, USA).  
41  
42  
43  
44  
45  
46  
47  
48

195

## 49 196 **RESULTS**

### 51 197 **Characteristics of study participants**

53 198 Data collection started in September 2016 and ended in October 2020. A total of 137  
54  
55 199 participants without GDM exposure and 212 participants with GDM exposure were  
56  
57 200 recruited in the study. Some 101 neonates without GDM exposure and 117 neonates  
58  
59  
60

1  
2  
3 201 with GDM exposure attended the cardiovascular follow-up visit early after birth. Of  
4  
5 202 these, 200 singleton neonates born at more than 36 weeks of gestation (non-GDM:  
6  
7 203 n=99; GDM: n=101) had CIMT measurements and constitute the analytic sample for  
8  
9 204 the current analysis.  
10  
11

12 205

14 206 Family and neonatal characteristics of study participants are presented in Table 1. The  
15  
16 207 maternal characteristics were generally comparable between the non-GDM and GDM  
17  
18 208 groups. The majority of women were non-Swiss and their age ranged from 18 to 47  
19  
20 209 years. Approximately half of the women in each group had a high level of education  
21  
22 210 and no previous deliveries. More women with GDM (16%) were obese (pre-pregnancy  
23  
24 211 BMI  $\geq$  30 kg/m<sup>2</sup>) compared to women without GDM (6%). Smoking during pregnancy  
25  
26 212 was more frequent among women with GDM (18%) than among those without GDM  
27  
28 213 (4%). Offspring of women with and without GDM had similar neonatal characteristics,  
29  
30 214 such as sex, gestational age, birth weight, length, or blood pressure. The majority were  
31  
32 215 born at term, i.e., between 37 and 41 weeks (GDM: 96%; non-GDM: 98%) and a small  
33  
34 216 share had macrosomia, i.e., a birth weight higher than 4'000 g (GDM: 6%; non-GDM:  
35  
36 217 5%). Offspring of women with GDM (46%) had a higher frequency of family history of  
37  
38 218 diabetes compared to their non-GDM counterparts (24%).  
39  
40  
41  
42  
43  
44  
45  
46  
47  
48  
49  
50  
51  
52  
53  
54  
55  
56  
57  
58  
59  
60

219 **Table 1** Characteristics of study participants by GDM exposure.

|                                                         | Non-GDM <sup>a</sup> (n=99) |      |       |       | GDM <sup>b</sup> (n=101) |      |       |       |
|---------------------------------------------------------|-----------------------------|------|-------|-------|--------------------------|------|-------|-------|
|                                                         | mean or %                   | sd   | min   | max   | mean or %                | sd   | min   | max   |
| <b>MATERNAL</b>                                         |                             |      |       |       |                          |      |       |       |
| Age (years)                                             | 33                          | 5    | 18    | 44    | 33                       | 5    | 21    | 47    |
| Swiss origin (%)                                        | 24                          |      |       |       | 33                       |      |       |       |
| University education (%)                                | 60                          |      |       |       | 55                       |      |       |       |
| Primiparous (%)                                         | 55                          |      |       |       | 48                       |      |       |       |
| Smoking during pregnancy (%)                            | 4                           |      |       |       | 18                       |      |       |       |
| Pre-pregnancy obesity (BMI ≥ 30 kg/m <sup>2</sup> ) (%) | 6                           |      |       |       | 16                       |      |       |       |
| HbA1C (%)                                               | 4.9                         | 0.3  | 4.2   | 5.7   | 5.3                      | 0.3  | 4.7   | 7.2   |
| <b>NEONATAL</b>                                         |                             |      |       |       |                          |      |       |       |
| Male (%)                                                | 52                          |      |       |       | 53                       |      |       |       |
| Cesarean section (%)                                    | 22                          |      |       |       | 32                       |      |       |       |
| Term birth (37 to 41 weeks) (%)                         | 98                          |      |       |       | 96                       |      |       |       |
| Birth weight (g)                                        | 3'352                       | 425  | 2'190 | 4'190 | 3'357                    | 442  | 2'220 | 4'340 |
| Macrosomia (Birth weight > 4'000 g) (%)                 | 5                           |      |       |       | 6                        |      |       |       |
| Length (cm)                                             | 50                          | 2    | 45    | 54    | 50                       | 2    | 45    | 56    |
| Body surface area (m <sup>2</sup> )                     | 0.21                        | 0.02 | 0.16  | 0.25  | 0.21                     | 0.02 | 0.17  | 0.26  |
| Systolic BP (mmHg)                                      | 78                          | 9    | 60    | 101   | 78                       | 10   | 60    | 111   |
| Diastolic BP (mmHg)                                     | 47                          | 8    | 30    | 66    | 48                       | 10   | 28    | 90    |
| Family history of diabetes (%)                          | 24                          |      |       |       | 46                       |      |       |       |

Abbreviations: BMI, body mass index; BP, blood pressure; GDM, gestational diabetes mellitus; HbA1c, glycated hemoglobin n, total number of participants; max, maximum; min, minimum; sd, standard deviation.

<sup>a</sup> Non-GDM: Missing values for swiss origin (n=1), university education (n=2), pre-pregnancy obesity (n=1), HbA1c (n=13), cesarean section (n=4), term birth (n=10), systolic BP (n=1), diastolic BP (n=1); family history of diabetes (n=1).

<sup>b</sup> GDM: Missing values for age (n=3), swiss origin (n=3), university education (n=18), primiparous (n=3), smoking (n=5), pre-pregnancy obesity (n=4), HbA1c (n=5), male (n=16), cesarean section (n=6), term birth (n=16), birth weight (n=16); family history of diabetes (n=4).

1  
2  
3 221 **GDM and CIMT at birth**  
4

5 222 The distribution of CIMT values is presented in Fig. 1 and Fig. 2. CIMT ranged from  
6  
7 223 0.21 to 0.42 mm, with a mean CIMT of 0.30 mm (sd 0.04) overall and in each of the  
8  
9 224 studied groups (Table 2, Table S1 in Supplementary Material).  
10  
11

12 225

13  
14 226 **Fig. 1** Histograms of CIMT at birth, overall and by GDM exposure.  
15

16 227 **Figure legend** This figure shows the distribution of CIMT values in our sample, overall  
17  
18 228 (n=200) and by GDM exposure (Non-GDM: n=99; GDM: n=101). The black line  
19  
20 229 represents the kernel density estimate. Abbreviations: CIMT, carotid intima-media  
21  
22 230 thickness; GDM, gestational diabetes mellitus.  
23  
24

25  
26 231

27  
28 232 **Fig. 2** Box plots of CIMT at birth by GDM exposure and assignment to a lifestyle and  
29  
30 233 psychosocial intervention.  
31

32 234 **Figure legend** This figure shows the distribution of CIMT in the offspring of women  
33  
34 235 without GDM (*Non-GDM*; n=99) and the offspring of women with GDM who were  
35  
36 236 assigned to no intervention (*GDM, non-I*; n=48) or to a lifestyle and psychosocial  
37  
38 237 intervention (*GDM, I*; n=53) as part of their participation in the *MySweetHeart* Trial.  
39  
40 238 Abbreviations: CIMT, carotid intima-media thickness; GDM, gestational diabetes  
41  
42 239 mellitus; I, intervention.  
43  
44  
45  
46  
47  
48  
49  
50  
51  
52  
53  
54  
55  
56  
57  
58  
59  
60

240 **Table 2** The relationship of GDM with offspring's CIMT at birth.

|         | Mean (SD), mm | Model 1 (n=200)         |      | Model 2 (n=165)         |      | Model 3 (n=165)         |      |
|---------|---------------|-------------------------|------|-------------------------|------|-------------------------|------|
|         |               | Difference (95% CI), mm | p    | Difference (95% CI), mm | p    | Difference (95% CI), mm | p    |
| Non-GDM | 0.30 (0.04)   | ref                     | ref  | ref                     | ref  | ref                     | ref  |
| GDM     | 0.30 (0.04)   | 0.00 (-0.01 to 0.01)    | 0.96 | 0.00 (-0.02 to 0.01)    | 0.47 | 0.00 (-0.02 to 0.01)    | 0.45 |

Model 1: unadjusted estimates.

Model 2: estimates adjusted for maternal pre-pregnancy BMI, education, and tobacco smoking; offspring family history of diabetes and sex.

Model 3: estimates adjusted for maternal pre-pregnancy BMI, education, and tobacco smoking; offspring family history of diabetes, sex, body surface area and age at CIMT assessment.

Abbreviations: CI, confidence interval; CIMT, carotid intima-media thickness; GDM, gestational diabetes mellitus; n, total number of participants; p, p-value; sd, standard deviation; ref, reference group.

Note: Similar results were obtained when Model 1 was run in the sample (n=165) with data on outcome, exposure, and all covariates included in Models 2 and 3 (GDM: 0.00 mm (95% CI: -0.02 to 0.01; p=0.54)).



1  
2  
3 242 The relationship of GDM with offspring's CIMT early after birth is presented in Table 2.  
4  
5 243 In the unadjusted analysis (Model 1), the difference in CIMT between offspring of  
6  
7 244 women with and without GDM was 0.00 mm (95% CI -0.01 to 0.01; p=0.96).  
8  
9 245 Adjustment for offspring sex and potential confounding factors (Model 2), as well as for  
10  
11 246 offspring's body surface area and age at CIMT assessment (Model 3), resulted in a  
12  
13 247 difference of 0 mm (95% CI -0.02 to 0.01; p=0.45). When exposure to GDM was  
14  
15 248 analyzed separately for offspring whose mothers were assigned or not to a lifestyle  
16  
17 249 and psychosocial intervention as part of their participation in *MySweetHeart* Trial,  
18  
19 250 results were similar to those presented above (Table S1 in Supplementary Material).  
20  
21  
22  
23  
24  
25

251

## 252 **DISCUSSION**

### 253 **Summary of findings and comparison with other studies**

254 Our goal was to assess the relationship of GDM with neonatal CIMT. We found no  
255 evidence of an increased CIMT in neonates born to women with GDM as compared to  
256 those born to women without GDM. Our findings are in line with other studies that  
257 evaluated CIMT after intrauterine exposure to maternal hyperglycemia. A recent meta-  
258 analysis pooled data from 3 studies and reported no clear evidence of increased CIMT  
259 in children exposed to maternal hyperglycemia compared to those not exposed (pooled  
260 standardized mean difference (SMD): 0.08 (95% CI -0.16 to 0.33)).[8] Two of these  
261 studies included 6-year and 8-year children, respectively, and found no difference in  
262 CIMT after exposure to GDM (SMD 0.00 (95% CI -0.28 to 0.28) at 6 years and 0.00  
263 (95% CI -0.41 to 0.41) at 8 years).[8,20,21] The third study included neonates and  
264 found a slightly higher CIMT among those exposed to diabetes (SMD 0.46 (95% CI -  
265 0.07 to 1.00)),[8,22] but the imprecision around the estimated difference was high, the

1  
2  
3 266 study had a very small sample size (n=55) and the authors did not specify whether  
4  
5 267 they included women with pre-gestational or gestational diabetes.[22]  
6  
7  
8 268

### 10 269 **Strengths and limitations**

11  
12 270 A major strength of this study is its prospective design. Enrollment of study participants  
13  
14 271 and collection of baseline characteristics took place close to the moment of GDM  
15  
16 272 diagnosis and ahead of the CIMT outcome assessment. This implies that the choice of  
17  
18 273 participation in the study is unlikely to be related to both the exposure and the outcome,  
19  
20 274 which makes selection bias due to enrollment unlikely. Further, GDM was diagnosed  
21  
22 275 using the new criteria of the IADPG. These criteria were derived based on the risk of  
23  
24 276 adverse neonatal outcomes, such as birth weight, cord blood C-peptide levels, or  
25  
26 277 percent infant body fat > 90th percentile.[15] They were endorsed by the World Health  
27  
28 278 Organization along with several other bodies to achieve a universal consensus for  
29  
30 279 GDM diagnosis and increase comparability of the evidence.[23,24] Another strength is  
31  
32 280 the assessment of ultrasound CIMT using automated methods with manual tracing  
33  
34 281 adjustment, in accordance with the current guidelines in children.[16,25] The semi-  
35  
36 282 automated methods are associated with a lower interoperator variability and high  
37  
38 283 reliability,[16,25] including in infants, as it was previously proved in our laboratory.[12]  
39  
40  
41  
42  
43  
44  
45  
46

47 285 This study has some limitations. Firstly, our results have limited generalizability, as we  
48  
49 286 used a convenient sample of pregnant women recruited from health care facilities in  
50  
51 287 Switzerland. Secondly, the GDM glucose screening test (FPG or 75-g OGTT) varied  
52  
53 288 between participants. This is because our hospital used a 2-step targeted approach for  
54  
55 289 identifying women with GDM. While the 2-step approach is practical and more  
56  
57 290 acceptable to patients,[26] it may be related to a lower likelihood of diagnosing GDM  
58  
59  
60

1  
2  
3 291 compared to a one-step universal screening based on a 75-g OGTT.[27] On the other  
4  
5 292 hand, the IADGSP criteria, which have a lower threshold for a positive FPG test ( $\geq 5.1$   
6  
7 293 mmol/L) compared to other guidelines,[23] may identify as having GDM women who  
8  
9 294 are at low absolute risk for fetal and pregnancy complications and, thus, overdiagnose  
10  
11 295 GDM in some populations.[28,29] Therefore, misclassification of the exposure cannot  
12  
13 296 be excluded and our estimates of association might be biased, maybe underestimated.  
14  
15 297 Additionally, women with GDM participated in *MySweetHeart* Trial and approximately  
16  
17 298 half of them were assigned to a lifestyle and psychosocial intervention with the aim of  
18  
19 299 improving their cardiometabolic outcomes. Although this intervention could have also  
20  
21 300 modified the association of GDM with CIMT, this seems not likely, as mean CIMT  
22  
23 301 values were very similar in offspring of women with GDM who participated in the  
24  
25 302 intervention and the control arms of the trial. Thirdly, CIMT was assessed using  
26  
27 303 conventional high-resolution ultrasound frequencies ( $< 15$  MHz), which tend to  
28  
29 304 overestimate the arterial thickness in the young children when compared to very high-  
30  
31 305 resolution ultrasound systems (25 to 55 MHz).[30,31] Measurement error in CIMT  
32  
33 306 cannot be excluded, but systematic differences between the two groups are unlikely  
34  
35 307 because the outcome assessors were blinded to the glycemic status of the mothers.  
36  
37 308 Fourthly, while we adjusted for key confounders at the analysis stage, there is a  
38  
39 309 possibility of residual confounding due to the relatively small sample size and some  
40  
41 310 imprecision in the measurement of confounder variables, especially in those self-  
42  
43 311 reported. Lastly, our study was limited to CIMT, which is a measure of arterial structure.  
44  
45 312 In fact, changes in the vessel function might occur earlier than changes in the vessel  
46  
47 313 structure, therefore, a combination of vascular measures would be needed for a clearer  
48  
49 314 view on the cardiovascular status of children exposed to adverse experiences in early  
50  
51 315 life. However, certain techniques to assess arterial function and stiffness, such as flow-  
52  
53  
54  
55  
56  
57  
58  
59  
60

1  
2  
3 316 mediated dilation and pulse-wave velocity, are not currently feasible in the very young  
4  
5 317 due to limited compliance and technical inconveniences.[18]  
6  
7  
8 318

### 10 319 **Implications and future research**

11  
12 320 Our results suggest that intrauterine exposure to GDM does not induce changes in the  
13  
14 321 carotid artery structure that are detectable with conventional ultrasound techniques at  
15  
16 322 birth and may not be linked to early vascular aging at this arterial site in the short term.  
17  
18 323 Measurements at other arterial sites, such as the aorta,[32] may be more useful to  
19  
20 324 investigate early or subtle abnormalities related to accelerated vascular aging or  
21  
22 325 subclinical atherosclerosis. A long-term follow-up that includes complementary  
23  
24 326 vascular measures, for instance, endothelium-dependent and endothelium-  
25  
26 327 independent vasodilation or large-artery stiffness,[20] may shed further light on the  
27  
28 328 cardiovascular health of children born to mothers with GDM.  
29  
30  
31  
32

### 33 329 34 35 330 **Patient and public involvement**

36  
37 331 There was no patient or public involvement in the design, conduct, analysis, or  
38  
39 332 reporting of this study's findings.  
40  
41  
42  
43

### 44 333 45 334 **Author affiliations**

46  
47 335 <sup>1</sup>Population Health Laboratory (#PopHealthLab), University of Fribourg, Fribourg,  
48  
49 336 Switzerland;

50  
51 337 <sup>2</sup>Department of Epidemiology and Health Services, Center for Primary Care and Public  
52  
53 338 Health (UNISANTÉ), University of Lausanne, Lausanne, Switzerland;

54  
55 339 <sup>3</sup>Paediatric Cardiology Unit, Woman-Mother-Child Department, Lausanne University  
56  
57 340 Hospital (CHUV), Lausanne, Switzerland;  
58  
59  
60

341 <sup>4</sup>Institute of Primary Health Care (BIHAM), University of Bern, Bern, Switzerland;

342 <sup>5</sup>School of Global and Population Health, McGill University, Montréal, Canada

343

### 344 **Authors' contributions**

345 AC, NS, SDB, and YM designed the study and the data collection procedures with  
346 input from SEY, AME. SEY and AME collected baseline characteristics for participants  
347 without GDM. SDB and NS collected neonatal cardiovascular characteristics for all  
348 participants. SEY performed data management and curation. AME carried out the  
349 statistical analyses with input and supervision from AC. AME wrote the first draft of the  
350 manuscript with input from AC and NS. SDB, SEY, YM made critical revisions to the  
351 manuscript for important intellectual content. All authors read and approved the content  
352 of the manuscript.

353

### 354 **Acknowledgements**

355 The study teams of *MySweetHeart* Cohort and *MySweetHeart* Trial form  
356 *MySweetHeart* Research group and collaborated on data collection, management, and  
357 curation. We thank the following members of *MySweetHeart* Research Group, listed in  
358 alphabetical order: Amar Arhab, Pascal Bovet, Arnaud Chiolero, Stefano Di Bernardo,  
359 Adina Mihaela Epure, Sandrine Estoppey Younes, Leah Gilbert, Justine Gross, Antje  
360 Horsch, Stefano Lanzi, Seyda Mayerat, Yvan Mivelaz, Jardena J. Puder, Dan  
361 Quansah, Jean-Benoit Rossel, Nicole Sekarski, Umberto Simeoni, Bobby Stuijtzand,  
362 Yvan Vial.

363

### 364 **Funding**

1  
2  
3 365 This study was funded by the Swiss National Science Foundation (www.snf.ch;  
4  
5 366 *MySweetHeart* Cohort project number 32003B-163240; *MySweetHeart* Trial project  
6  
7 367 number 32003B\_176119). The funder had no role in the study design, data collection  
8  
9 368 and analysis, or interpretation of results.  
10  
11  
12 369

### 14 370 **Competing interests**

16 371 None declared.  
17  
18  
19 372

### 21 373 **Consent for publication**

23 374 Not applicable.  
24  
25  
26 375

### 28 376 **Ethics approval**

30 377 Ethical approval was obtained through the Ethics Committee for Human Research of  
31  
32 378 the Canton of Vaud (2016–00745).  
33  
34  
35 379

### 37 380 **Data availability statement**

39 381 Data could be made available by the principal investigator and corresponding author  
40  
41 382 (Prof Nicole Sekarski: [nicole.sekarski@chuv.ch](mailto:nicole.sekarski@chuv.ch)) on reasonable request.  
42  
43  
44 383

384 **REFERENCES**

- 385 1. Reece EA, Leguizamón G, Wiznitzer A. Gestational diabetes: the need for a  
386 common ground. *Lancet* 2009;373(9677):1789-97. doi: 10.1016/s0140-  
387 6736(09)60515-8.
- 388 2. Reece EA. The fetal and maternal consequences of gestational diabetes mellitus. *J*  
389 *Matern Fetal Neonatal Med* 2010;23(3):199-203. doi:  
390 10.3109/14767050903550659.
- 391 3. American Diabetes Association (ADA). 2. Classification and Diagnosis of Diabetes:  
392 Standards of Medical Care in Diabetes—2021. *Diabetes Care*  
393 2021;44(Supplement 1):S15-S33. doi: 10.2337/dc21-S002.
- 394 4. International Diabetes Federation. IDF Diabetes Atlas. 9th edition. Brussels,  
395 Belgium: International Diabetes Federation, 2019.
- 396 5. Damm P, Houshmand-Oeregaard A, Kelstrup L, et al. Gestational diabetes mellitus  
397 and long-term consequences for mother and offspring: a view from Denmark.  
398 *Diabetologia* 2016;59(7):1396-99. doi: 10.1007/s00125-016-3985-5.
- 399 6. Li JW, He SY, Liu P, et al. Association of gestational diabetes mellitus (GDM) with  
400 subclinical atherosclerosis: a systemic review and meta-analysis. *BMC*  
401 *Cardiovasc Disord* 2014;14:132. doi: 10.1186/1471-2261-14-132.
- 402 7. Tobias DK, Stuart JJ, Li S, et al. Association of History of Gestational Diabetes With  
403 Long-term Cardiovascular Disease Risk in a Large Prospective Cohort of US  
404 Women. *JAMA Intern Med* 2017;177(12):1735-42. doi:  
405 10.1001/jamainternmed.2017.2790.
- 406 8. Epure AM, Rios-Leyvraz M, Anker D, et al. Risk factors during first 1,000 days of life  
407 for carotid intima-media thickness in infants, children, and adolescents: A

- 1  
2  
3 408 systematic review with meta-analyses. *PLoS Med* 2020;17(11):e1003414. doi:  
4  
5 409 10.1371/journal.pmed.1003414.  
6  
7  
8 410 9. Giannopoulou EZ, Doundoulakis I, Antza C, et al. Subclinical arterial damage in  
9  
10 411 children and adolescents with type 1 diabetes: A systematic review and meta-  
11  
12 412 analysis. *Pediatr Diabetes* 2019;20(6):668-77. doi: 10.1111/pedi.12874.  
13  
14  
15 413 10. Hanson MA, Gluckman PD. Early developmental conditioning of later health and  
16  
17 414 disease: physiology or pathophysiology? *Physiol Rev* 2014;94(4):1027-76. doi:  
18  
19 415 10.1152/physrev.00029.2013.  
20  
21  
22 416 11. Aceti A, Santhakumaran S, Logan KM, et al. The diabetic pregnancy and offspring  
23  
24 417 blood pressure in childhood: a systematic review and meta-analysis.  
25  
26 418 *Diabetologia* 2012;55(11):3114-27. doi: 10.1007/s00125-012-2689-8.  
27  
28  
29 419 12. Mivelaz Y, Di Bernardo S, Boulos Ksontini T, et al. Feasibility and reliability of  
30  
31 420 carotid intima-media thickness measurements in nonsedated infants. *J*  
32  
33 421 *Hypertens* 2016;34(11):2227-32. doi: 10.1097/hjh.0000000000001065.  
34  
35  
36 422 13. Di Bernardo S, Mivelaz Y, Epure AM, et al. Assessing the consequences of  
37  
38 423 gestational diabetes mellitus on offspring's cardiovascular health:  
39  
40 424 MySweetHeart Cohort study protocol, Switzerland. *BMJ Open*  
41  
42 425 2017;7(11):e016972. doi: 10.1136/bmjopen-2017-016972.  
43  
44  
45 426 14. Horsch A, Gilbert L, Lanzi S, et al. Improving cardiometabolic and mental health in  
46  
47 427 women with gestational diabetes mellitus and their offspring: study protocol for  
48  
49 428 MySweetHeart Trial, a randomised controlled trial. *BMJ Open*  
50  
51 429 2018;8(2):e020462. doi: 10.1136/bmjopen-2017-020462.  
52  
53  
54 430 15. Metzger BE, Gabbe SG, Persson B, et al. International association of diabetes and  
55  
56 431 pregnancy study groups recommendations on the diagnosis and classification  
57  
58  
59  
60



- 1  
2  
3 432 of hyperglycemia in pregnancy. *Diabetes Care* 2010;33(3):676-82. doi:  
4  
5 433 10.2337/dc09-1848.  
6  
7  
8 434 16. Urbina EM, Williams RV, Alpert BS, et al. Noninvasive assessment of subclinical  
9  
10 435 atherosclerosis in children and adolescents: recommendations for standard  
11  
12 436 assessment for clinical research: a scientific statement from the American Heart  
13  
14 437 Association. *Hypertension* 2009;54(5):919-50. doi:  
15  
16 438 10.1161/hypertensionaha.109.192639.  
17  
18  
19 439 17. Mosteller RD. Simplified calculation of body-surface area. *N Engl J Med*  
20  
21 440 1987;317(17):1098. doi: 10.1056/nejm198710223171717.  
22  
23  
24 441 18. Torigoe T, Dallaire F, Slorach C, et al. New Comprehensive Reference Values for  
25  
26 442 Arterial Vascular Parameters in Children. *J Am Soc Echocardiogr* 2020 doi:  
27  
28 443 10.1016/j.echo.2020.03.001.  
29  
30  
31 444 19. Sarkola T, Manhiot C, Slorach C, et al. Evolution of the arterial structure and  
32  
33 445 function from infancy to adolescence is related to anthropometric and blood  
34  
35 446 pressure changes. *Circulation* 2012;126(21).  
36  
37  
38 447 20. Sundholm JKM, Litwin L, Rönö K, et al. Maternal obesity and gestational diabetes:  
39  
40 448 Impact on arterial wall layer thickness and stiffness in early childhood - RADIEL  
41  
42 449 study six-year follow-up. *Atherosclerosis* 2019 doi:  
43  
44 450 10.1016/j.atherosclerosis.2019.01.037.  
45  
46  
47 451 21. Ayer JG, Harmer JA, Nakhla S, et al. HDL-cholesterol, blood pressure, and  
48  
49 452 asymmetric dimethylarginine are significantly associated with arterial wall  
50  
51 453 thickness in children. *Arterioscler Thromb Vasc Biol* 2009;29(6):943-49. doi:  
52  
53 454 10.1161/ATVBAHA.109.184184.  
54  
55  
56  
57  
58  
59  
60

- 1  
2  
3 455 22. Atabek ME, Çağan HH, Eklioğlu BS, et al. Absence of increase in carotid artery  
4  
5 456 Intima-Media thickness in infants of diabetic mothers. *J Clin Res Pediatr*  
6  
7 457 *Endocrinol* 2011;3(3):144-48. doi: 10.4274/jcrpe.v3i3.28.  
8  
9  
10 458 23. World Health Organization. Diagnostic criteria and classification of hyperglycaemia  
11  
12 459 first detected in pregnancy: a World Health Organization Guideline. *Diabetes*  
13  
14 460 *Res Clin Pract* 2014;103(3):341-63. doi: 10.1016/j.diabres.2013.10.012.  
15  
16  
17 461 24. Yuen L, Saeedi P, Riaz M, et al. Projections of the prevalence of hyperglycaemia  
18  
19 462 in pregnancy in 2019 and beyond: Results from the International Diabetes  
20  
21 463 Federation Diabetes Atlas, 9th edition. *Diabetes Res Clin Pract*  
22  
23 464 2019;157:107841. doi: 10.1016/j.diabres.2019.107841.  
24  
25  
26 465 25. Dalla Pozza R, Ehringer-Schetitska D, Fritsch P, et al. Intima media thickness  
27  
28 466 measurement in children: A statement from the Association for European  
29  
30 467 Paediatric Cardiology (AEPIC) Working Group on Cardiovascular Prevention  
31  
32 468 endorsed by the Association for European Paediatric Cardiology.  
33  
34 469 *Atherosclerosis* 2015;238(2):380-7. doi:  
35  
36 470 10.1016/j.atherosclerosis.2014.12.029.  
37  
38  
39  
40 471 26. Agarwal MM, Dhatt GS, Shah SM. Gestational Diabetes Mellitus: Simplifying the  
41  
42 472 International Association of Diabetes and Pregnancy diagnostic algorithm using  
43  
44 473 fasting plasma glucose. *Diabetes Care* 2010;33(9):2018. doi: 10.2337/dc10-  
45  
46 474 0572.  
47  
48  
49 475 27. Mahdavian M, Hivert M-F, Baillargeon J-P, et al. Gestational Diabetes Mellitus:  
50  
51 476 Simplifying the International Association of Diabetes and Pregnancy Diagnostic  
52  
53 477 Algorithm Using Fasting Plasma Glucose. Comment on Agarwal, Dhatt, and  
54  
55 478 Shah. *Diabetes Care* 2010;33(11):e145. doi: 10.2337/dc10-1454.  
56  
57  
58  
59  
60

- 1  
2  
3 479 28. McIntyre HD, Jensen DM, Jensen RC, et al. Gestational Diabetes Mellitus: Does  
4  
5 480 One Size Fit All? A Challenge to Uniform Worldwide Diagnostic Thresholds.  
6  
7 481 *Diabetes Care* 2018;41(7):1339-42. doi: 10.2337/dc17-2393.  
8  
9  
10 482 29. Brodersen J, Schwartz LM, Heneghan C, et al. Overdiagnosis: what it is and what  
11  
12 483 it isn't. *BMJ Evidence-Based Medicine* 2018;23(1):1. doi: 10.1136/ebmed-2017-  
13  
14 484 110886.  
15  
16  
17 485 30. Olander RFW, Sundholm JKM, Ojala TH, et al. Neonatal Arterial Morphology Is  
18  
19 486 Related to Body Size in Abnormal Human Fetal Growth. *Circ Cardiovasc*  
20  
21 487 *Imaging* 2016;9(9) doi: 10.1161/CIRCIMAGING.116.004657.  
22  
23  
24 488 31. Sarkola T, Slorach C, Hui W, et al. Transcutaneous very-high resolution ultrasound  
25  
26 489 for the quantification of carotid arterial intima-media thickness in children -  
27  
28 490 feasibility and comparison with conventional high resolution vascular ultrasound  
29  
30 491 imaging. *Atherosclerosis* 2012;224(1):102-7. doi:  
31  
32 492 10.1016/j.atherosclerosis.2012.06.054.  
33  
34  
35 493 32. Koklu E, Akcakus M, Kurtoglu S, et al. Aortic intima-media thickness and lipid  
36  
37 494 profile in macrosomic newborns. *Eur J Pediatr* 2007;166(4):333-8. doi:  
38  
39 495 10.1007/s00431-006-0243-8.  
40  
41  
42  
43 496

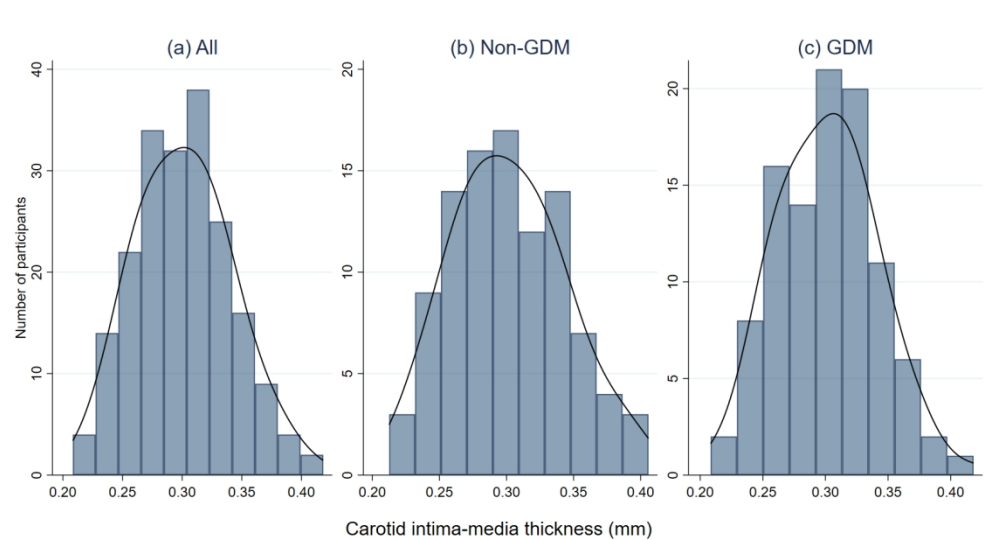

This figure shows the distribution of CIMT values in our sample, overall (n=200) and by GDM exposure (Non-GDM: n=99; GDM: n=101). The black line represents the kernel density estimate. Abbreviations: CIMT, carotid intima-media thickness; GDM, gestational diabetes mellitus.

599x326mm (72 x 72 DPI)

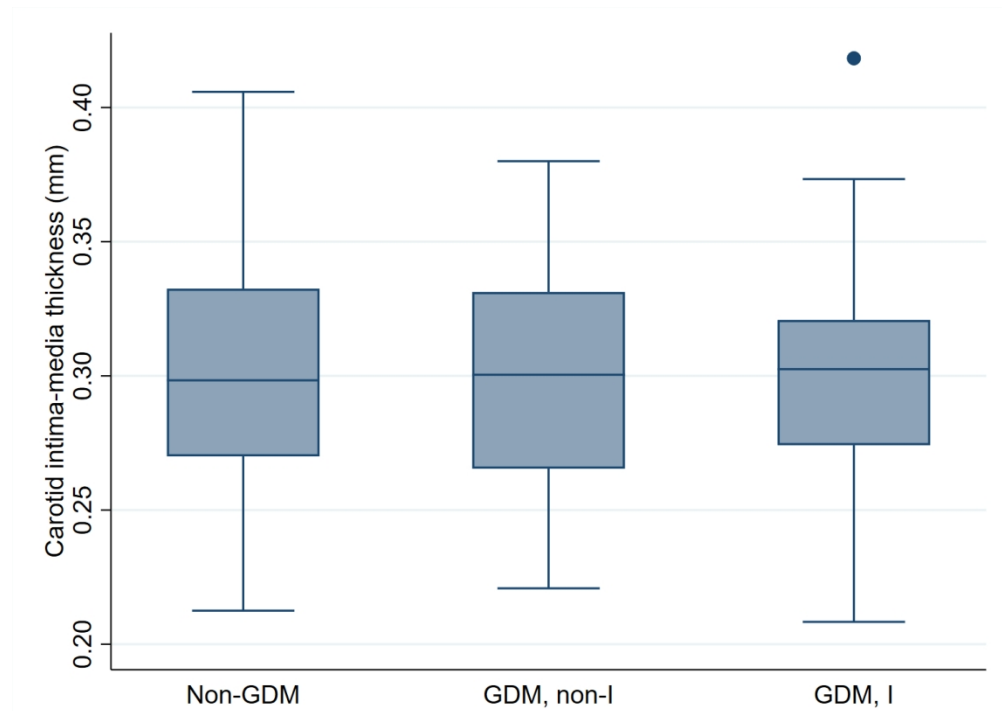

This figure shows the distribution of CIMT in the offspring of women without GDM (Non-GDM; n=99) and the offspring of women with GDM who were assigned to no intervention (GDM, non-I; n=48) or to a lifestyle and psychosocial intervention (GDM, I; n=53) as part of their participation in the MySweetHeart Trial. Abbreviations: CIMT, carotid intima-media thickness; GDM, gestational diabetes mellitus; I, intervention.

543x395mm (72 x 72 DPI)

## SUPPLEMENTARY MATERIAL

### **Gestational diabetes mellitus and offspring's carotid intima-media thickness at birth: *MySweetHeart* Cohort Study**

Adina Mihaela Epure<sup>1,2</sup>, Stefano Di Bernardo<sup>3</sup>, Yvan Mivelaz<sup>3</sup>, Sandrine Estoppey Younes<sup>2</sup>, Arnaud Chiolero<sup>1,4,5¶</sup>, Nicole Sekarski<sup>3¶</sup>,  
on behalf of *MySweetHeart* Research Group

<sup>1</sup>Population Health Laboratory (#PopHealthLab), University of Fribourg, Fribourg, Switzerland;

<sup>2</sup>Department of Epidemiology and Health Services, Center for Primary Care and Public Health (UNISANTÉ), University of Lausanne, Lausanne, Switzerland;

<sup>3</sup>Paediatric Cardiology Unit, Woman-Mother-Child Department, Lausanne University Hospital (CHUV), Lausanne, Switzerland;

<sup>4</sup>Institute of Primary Health Care (BIHAM), University of Bern, Bern, Switzerland;

<sup>5</sup>School of Global and Population Health, McGill University, Montréal, Canada

¶ These authors contributed equally to this work.

**Table S1** Differences in CIMT at birth by GDM exposure and assignment to a lifestyle and psychosocial intervention.

|            | Mean (sd), mm | <b>Model 1 (n=200)</b>  |      | <b>Model 2 (n=165)</b>  |      | <b>Model 3 (n=165)</b>  |      |
|------------|---------------|-------------------------|------|-------------------------|------|-------------------------|------|
|            |               | Difference (95% CI), mm | p    | Difference (95% CI), mm | p    | Difference (95% CI), mm | p    |
| Non-GDM    | 0.30 (0.04)   | ref                     | ref  | ref                     | ref  | ref                     | ref  |
| GDM, non-I | 0.30 (0.04)   | 0.00 (-0.01 to 0.01)    | 0.94 | 0.00 (-0.02 to 0.02)    | 0.93 | 0.00 (-0.02 to 0.01)    | 0.91 |
| GDM, I     | 0.30 (0.04)   | 0.00 (-0.01 to 0.01)    | 0.98 | -0.01 (-0.03 to 0.01)   | 0.19 | -0.01 (-0.02 to 0.01)   | 0.25 |

Model 1: unadjusted estimates.

Model 2: estimates adjusted for maternal pre-pregnancy BMI, education, and tobacco smoking; offspring family history of diabetes and sex.

Model 3: estimates adjusted for maternal pre-pregnancy BMI, education, and tobacco smoking; offspring family history of diabetes, sex, body surface area and age at CIMT assessment.

Abbreviations: CI, confidence interval; CIMT, carotid intima-media thickness; GDM, gestational diabetes mellitus; I, intervention; n, total number of participants; p, p-value; sd, standard deviation; ref, reference group.

Note: Similar results were obtained when Model 1 was run in the sample (n=165) with data on outcome, exposure, and all covariates included in Models 2 and 3 (GDM, non-I: 0.00 mm (95% CI: -0.01 to 0.01; p=0.99); GDM, I: -0.01 mm (95% CI: -0.02 to 0.01; p=0.29)).

**STROBE 2007 (v4) Statement—Checklist of items that should be included in reports of *cohort studies* [1]**

| Section/Topic            | Item # | Recommendation                                                                                                                                                                       | Reported in section [page # in Main text]                                                                                                                                                                              |
|--------------------------|--------|--------------------------------------------------------------------------------------------------------------------------------------------------------------------------------------|------------------------------------------------------------------------------------------------------------------------------------------------------------------------------------------------------------------------|
| Title and abstract       | 1      | (a) Indicate the study's design with a commonly used term in the title or the abstract                                                                                               | Title page [page 1]                                                                                                                                                                                                    |
|                          |        | (b) Provide in the abstract an informative and balanced summary of what was done and what was found                                                                                  | Abstract [page 2-3]                                                                                                                                                                                                    |
| <b>Introduction</b>      |        |                                                                                                                                                                                      |                                                                                                                                                                                                                        |
| Background/rationale     | 2      | Explain the scientific background and rationale for the investigation being reported                                                                                                 | Introduction (paragraphs 1-2) [page 5]                                                                                                                                                                                 |
| Objectives               | 3      | State specific objectives, including any prespecified hypotheses                                                                                                                     | Introduction (paragraph 2) [page 5]                                                                                                                                                                                    |
| <b>Methods</b>           |        |                                                                                                                                                                                      |                                                                                                                                                                                                                        |
| Study design             | 4      | Present key elements of study design early in the paper                                                                                                                              | - Methods (subheadings: Study design and setting; Study population) [page 6]<br>- Published protocol (see reference [2])                                                                                               |
| Setting                  | 5      | Describe the setting, locations, and relevant dates, including periods of recruitment, exposure, follow-up, and data collection                                                      | - Methods (subheadings: Study design and setting; Study population; Data collection) [page 6-9]<br>- Results (subheadings: Characteristics of study participants) [page 9]<br>- Published protocol (see reference [2]) |
| Participants             | 6      | (a) Give the eligibility criteria, and the sources and methods of selection of participants. Describe methods of follow-up                                                           | - Methods (subheadings: Study population) [page 6]<br>- Published protocol (see reference [2])                                                                                                                         |
|                          |        | (b) For matched studies, give matching criteria and number of exposed and unexposed                                                                                                  | - N/A                                                                                                                                                                                                                  |
| Variables                | 7      | Clearly define all outcomes, exposures, predictors, potential confounders, and effect modifiers. Give diagnostic criteria, if applicable                                             | - Methods (subheadings: Data collection; Data analysis) [page 6-9]                                                                                                                                                     |
| Data sources/measurement | 8*     | For each variable of interest, give sources of data and details of methods of assessment (measurement). Describe comparability of assessment methods if there is more than one group | - Methods (subheadings: Data collection) [page 6-8]                                                                                                                                                                    |
| Bias                     | 9      | Describe any efforts to address potential sources of bias                                                                                                                            | - Methods (subheadings: Data analysis) [page 9]<br>- Discussion (subheadings: Strengths and limitations) [page 15-16]                                                                                                  |



|                        |     |                                                                                                                                                                                                              |                                                                                                      |
|------------------------|-----|--------------------------------------------------------------------------------------------------------------------------------------------------------------------------------------------------------------|------------------------------------------------------------------------------------------------------|
| Study size             | 10  | Explain how the study size was arrived at                                                                                                                                                                    | - Published protocol[2]                                                                              |
| Quantitative variables | 11  | Explain how quantitative variables were handled in the analyses. If applicable, describe which groupings were chosen and why                                                                                 | - Methods (subheadings: Data analysis) [page 9]                                                      |
| Statistical methods    | 12  | (a) Describe all statistical methods, including those used to control for confounding                                                                                                                        | - Methods (subheadings: Data analysis) [page 9]                                                      |
|                        |     | (b) Describe any methods used to examine subgroups and interactions                                                                                                                                          |                                                                                                      |
|                        |     | (c) Explain how missing data were addressed                                                                                                                                                                  | - Methods (subheadings: Study population; Data analysis) [page 6; 9]<br>- Table 1 footnote [page 11] |
|                        |     | (d) If applicable, explain how loss to follow-up was addressed                                                                                                                                               | - Methods (subheadings: Study population) [page 6]                                                   |
|                        |     | (e) Describe any sensitivity analyses                                                                                                                                                                        | - Supplementary material (Table S1)                                                                  |
| <b>Results</b>         |     |                                                                                                                                                                                                              |                                                                                                      |
| Participants           | 13* | (a) Report numbers of individuals at each stage of study—eg numbers potentially eligible, examined for eligibility, confirmed eligible, included in the study, completing follow-up, and analysed            | - Results (subheadings: Characteristics of study participants) [page 9-10]                           |
|                        |     | (b) Give reasons for non-participation at each stage                                                                                                                                                         |                                                                                                      |
|                        |     | (c) Consider use of a flow diagram                                                                                                                                                                           |                                                                                                      |
| Descriptive data       | 14* | (a) Give characteristics of study participants (eg demographic, clinical, social) and information on exposures and potential confounders                                                                     | - Results (subheadings: Characteristics of study participants; Table 1) [page 10-11]                 |
|                        |     | (b) Indicate number of participants with missing data for each variable of interest                                                                                                                          | - Results (Table 1) [page 11]                                                                        |
|                        |     | (c) Summarise follow-up time (eg, average and total amount)                                                                                                                                                  | - Methods (subheadings: Study population; Carotid ultrasound and CIMT measurement) [page 6-7]        |
| Outcome data           | 15* | Report numbers of outcome events or summary measures over time                                                                                                                                               | - Results (Table 2) [page 13]                                                                        |
| Main results           | 16  | (a) Give unadjusted estimates and, if applicable, confounder-adjusted estimates and their precision (eg, 95% confidence interval). Make clear which confounders were adjusted for and why they were included | - Results (Table 2) [page 13]                                                                        |
|                        |     | (b) Report category boundaries when continuous variables were categorized                                                                                                                                    | - Results (Table 1) [page 11]                                                                        |
|                        |     | (c) If relevant, consider translating estimates of relative risk into absolute risk for a meaningful time period                                                                                             | - N/A                                                                                                |
| Other analyses         | 17  | Report other analyses done—eg analyses of subgroups and interactions, and sensitivity analyses                                                                                                               | - Supplementary material (Table S1)                                                                  |

|                          |    |                                                                                                                                                                            |                                                                                                              |
|--------------------------|----|----------------------------------------------------------------------------------------------------------------------------------------------------------------------------|--------------------------------------------------------------------------------------------------------------|
| <b>Discussion</b>        |    |                                                                                                                                                                            |                                                                                                              |
| Key results              | 18 | Summarise key results with reference to study objectives                                                                                                                   | - Discussion (Summary of findings and comparison with other studies) [page 14]                               |
| <b>Limitations</b>       |    |                                                                                                                                                                            |                                                                                                              |
| Interpretation           | 20 | Give a cautious overall interpretation of results considering objectives, limitations, multiplicity of analyses, results from similar studies, and other relevant evidence | - Discussion (Summary of findings and comparison with other studies; Strengths and limitations) [page 14-16] |
| Generalisability         | 21 | Discuss the generalisability (external validity) of the study results                                                                                                      | - Discussion (Strengths and limitations) [page 15-16]                                                        |
| <b>Other information</b> |    |                                                                                                                                                                            |                                                                                                              |
| Funding                  | 22 | Give the source of funding and the role of the funders for the present study and, if applicable, for the original study on which the present article is based              | - Funding statement [page 19]                                                                                |

\*Give information separately for cases and controls in case-control studies and, if applicable, for exposed and unexposed groups in cohort and cross-sectional studies.

**Note:** Information on the STROBE Initiative is available at [www.strobe-statement.org](http://www.strobe-statement.org).

## References

1. von Elm E, Altman DG, Egger M, et al. The Strengthening the Reporting of Observational Studies in Epidemiology (STROBE) Statement: Guidelines for Reporting Observational Studies. *PLOS Medicine* 2007;4(10):e296. doi: 10.1371/journal.pmed.0040296.
2. Di Bernardo S, Mivelaz Y, Epure AM, et al. Assessing the consequences of gestational diabetes mellitus on offspring's cardiovascular health: MySweetHeart Cohort study protocol, Switzerland. *BMJ Open* 2017;7(11):e016972. doi: 10.1136/bmjopen-2017-016972.

# BMJ Open

## Gestational diabetes mellitus and offspring's carotid intima-media thickness at birth: MySweetHeart Cohort Study

|                                 |                                                                                                                                                                                                                                                                                                                                                                                                                                                                                                                                                                                                                                                                                                                                                                                                                       |
|---------------------------------|-----------------------------------------------------------------------------------------------------------------------------------------------------------------------------------------------------------------------------------------------------------------------------------------------------------------------------------------------------------------------------------------------------------------------------------------------------------------------------------------------------------------------------------------------------------------------------------------------------------------------------------------------------------------------------------------------------------------------------------------------------------------------------------------------------------------------|
| Journal:                        | <i>BMJ Open</i>                                                                                                                                                                                                                                                                                                                                                                                                                                                                                                                                                                                                                                                                                                                                                                                                       |
| Manuscript ID                   | bmjopen-2022-061649.R1                                                                                                                                                                                                                                                                                                                                                                                                                                                                                                                                                                                                                                                                                                                                                                                                |
| Article Type:                   | Original research                                                                                                                                                                                                                                                                                                                                                                                                                                                                                                                                                                                                                                                                                                                                                                                                     |
| Date Submitted by the Author:   | 17-Jun-2022                                                                                                                                                                                                                                                                                                                                                                                                                                                                                                                                                                                                                                                                                                                                                                                                           |
| Complete List of Authors:       | Epure, Adina Mihaela; University of Fribourg, Population Health Laboratory; University of Lausanne, Center for Primary Care and Public Health, Department of Epidemiology and Health Services<br>Di Bernardo, Stefano; Lausanne University Hospital, Paediatric Cardiology Unit, Department Woman-Mother-Child<br>Mivelaz, Yvan; Lausanne University Hospital, Paediatric Cardiology Unit, Department Woman-Mother-Child<br>Estoppey Younes, Sandrine; University of Lausanne, Center for Primary Care and Public Health, Department of Epidemiology and Health Services<br>Chiolero, Arnaud; University of Fribourg, Population Health Laboratory; University of Bern, Institute of Primary Health Care<br>Sekarski, Nicole; Lausanne University Hospital, Paediatric Cardiology Unit, Woman-Mother-Child Department |
| <b>Primary Subject Heading</b>: | Cardiovascular medicine                                                                                                                                                                                                                                                                                                                                                                                                                                                                                                                                                                                                                                                                                                                                                                                               |
| Secondary Subject Heading:      | Epidemiology, Paediatrics                                                                                                                                                                                                                                                                                                                                                                                                                                                                                                                                                                                                                                                                                                                                                                                             |
| Keywords:                       | Cardiovascular imaging < RADIOLOGY & IMAGING, Paediatric cardiology < CARDIOLOGY, Diabetes in pregnancy < DIABETES & ENDOCRINOLOGY, NEONATOLOGY, Cardiac Epidemiology < CARDIOLOGY                                                                                                                                                                                                                                                                                                                                                                                                                                                                                                                                                                                                                                    |
|                                 |                                                                                                                                                                                                                                                                                                                                                                                                                                                                                                                                                                                                                                                                                                                                                                                                                       |

SCHOLARONE™  
Manuscripts



I, the Submitting Author has the right to grant and does grant on behalf of all authors of the Work (as defined in the below author licence), an exclusive licence and/or a non-exclusive licence for contributions from authors who are: i) UK Crown employees; ii) where BMJ has agreed a CC-BY licence shall apply, and/or iii) in accordance with the terms applicable for US Federal Government officers or employees acting as part of their official duties; on a worldwide, perpetual, irrevocable, royalty-free basis to BMJ Publishing Group Ltd ("BMJ") its licensees and where the relevant Journal is co-owned by BMJ to the co-owners of the Journal, to publish the Work in this journal and any other BMJ products and to exploit all rights, as set out in our [licence](#).

The Submitting Author accepts and understands that any supply made under these terms is made by BMJ to the Submitting Author unless you are acting as an employee on behalf of your employer or a postgraduate student of an affiliated institution which is paying any applicable article publishing charge ("APC") for Open Access articles. Where the Submitting Author wishes to make the Work available on an Open Access basis (and intends to pay the relevant APC), the terms of reuse of such Open Access shall be governed by a Creative Commons licence – details of these licences and which [Creative Commons](#) licence will apply to this Work are set out in our licence referred to above.

Other than as permitted in any relevant BMJ Author's Self Archiving Policies, I confirm this Work has not been accepted for publication elsewhere, is not being considered for publication elsewhere and does not duplicate material already published. I confirm all authors consent to publication of this Work and authorise the granting of this licence.

1  
2  
3 1 **Gestational diabetes mellitus and offspring's carotid intima-media thickness at**  
4  
5 2 **birth: *MySweetHeart* Cohort Study**  
6  
7  
8 3

9  
10 4 Adina Mihaela Epure<sup>1,2</sup>, Stefano Di Bernardo<sup>3</sup>, Yvan Mivelaz<sup>3</sup>, Sandrine Estoppey  
11  
12 5 Younes<sup>2</sup>, Arnaud Chiolero<sup>1,4,5¶</sup>, Nicole Sekarski<sup>3¶\*</sup>, on behalf of *MySweetHeart*  
13  
14 6 Research Group  
15  
16  
17 7

18  
19 8 <sup>1</sup>Population Health Laboratory (#PopHealthLab), University of Fribourg, Fribourg,  
20  
21 9 Switzerland;

22  
23  
24 10 <sup>2</sup>Department of Epidemiology and Health Services, Center for Primary Care and Public  
25  
26 11 Health (UNISANTÉ), University of Lausanne, Lausanne, Switzerland;

27  
28 12 <sup>3</sup>Paediatric Cardiology Unit, Woman-Mother-Child Department, Lausanne University  
29  
30 13 Hospital (CHUV), Lausanne, Switzerland;

31  
32  
33 14 <sup>4</sup>Institute of Primary Health Care (BIHAM), University of Bern, Bern, Switzerland;

34  
35 15 <sup>5</sup>School of Global and Population Health, McGill University, Montréal, Canada  
36  
37  
38 16

39  
40 17 ¶ These authors contributed equally to this work.  
41  
42  
43 18

44  
45 19 \* **Corresponding author:** Prof Nicole Sekarski, [nicole.sekarski@chuv.ch](mailto:nicole.sekarski@chuv.ch), Lausanne  
46  
47 20 University Hospital (CHUV), 46 Route du Bugnon, Lausanne, 1011, Switzerland  
48  
49  
50 21

51  
52 22 **Word count** (excluding title page, abstract and article summary, references, figure  
53  
54 23 legends and tables): 2'924  
55  
56  
57  
58  
59  
60

1  
2  
3 24 **ABSTRACT**

4  
5 25 **Objective** Hyperglycemia during pregnancy is associated with cardiometabolic risks  
6  
7 26 for the mother and the offspring. Mothers with gestational diabetes mellitus (GDM)  
8  
9 27 have signs of subclinical atherosclerosis, including increased carotid intima-media  
10  
11 28 thickness (CIMT). We assessed whether GDM is associated with increased CIMT in  
12  
13  
14 29 the offspring at birth.  
15  
16  
17 30

18  
19 31 **Design and setting** *MySweetHeart* Cohort is a prospective cohort study conducted in  
20  
21 32 Switzerland.  
22  
23  
24 33

25  
26 34 **Participants, exposure and outcome measures** This work included pregnant  
27  
28 35 women with and without GDM at 24 to 32 weeks of gestation and their singleton live-  
29  
30 36 born offspring with data on the primary outcome of CIMT. GDM was diagnosed based  
31  
32 37 on the criteria of the International Association of Diabetes and Pregnancy Study  
33  
34 38 Groups. Offspring's CIMT was measured by ultrasonography after birth (range: 1 to 19  
35  
36 39 days).  
37  
38  
39 40

41  
42 41 **Results** Data on CIMT were available for 99 offspring of women without GDM and 101  
43  
44 42 offspring of women with GDM. Maternal age ranged from 18 to 47 years. Some 16%  
45  
46 43 of women with GDM and 6% of women without GDM were obese. Smoking during  
47  
48 44 pregnancy was more frequent among women with GDM (18%) than among those  
49  
50 45 without GDM (4%). Neonatal characteristics were comparable between the 2 groups.  
51  
52 46 The difference in CIMT between offspring of women with and without GDM was of 0.00  
53  
54 47 mm (95% CI: -0.01 to 0.01; p=0.96) and remained similar upon adjustment for potential  
55  
56 48 confounding factors, such as maternal pre-pregnancy BMI, maternal education,  
57  
58  
59  
60

1  
2  
3 49 smoking during pregnancy, family history of diabetes, as well as offspring's sex, age,  
4  
5 50 and body surface area (0.00 mm (95% CI: -0.02 to 0.01; p=0.45)).  
6  
7  
8 51

9  
10 52 **Conclusions** We found no evidence of increased CIMT in neonates exposed to GDM.  
11  
12 53 A longer-term follow-up that includes additional vascular measures, such as  
13  
14 54 endothelial function or arterial stiffness, may shed further light on the cardiovascular  
15  
16 55 health trajectories in children born to mothers with GDM.  
17  
18  
19 56

20  
21 57 **Registration** ClinicalTrials.gov (NCT02872974)  
22  
23  
24 58

25  
26 59 **Keywords** gestational diabetes; carotid intima-media thickness; cardiovascular  
27  
28 60 prevention; child; neonate  
29  
30  
31 61

32  
33 62 **List of abbreviations** BMI, body mass index; CIMT, carotid intima-media thickness;  
34  
35 63 CVD, cardiovascular disease; CHUV, Lausanne University Hospital; DOHaD,  
36  
37 64 developmental origins of health and disease; FPG, fasting plasma glucose; GDM,  
38  
39 65 gestational diabetes mellitus; HbA1c, glycated hemoglobin; IADPSG, International  
40  
41 66 Association of Diabetes and Pregnancy Study Groups; I, intervention; OGTT, oral  
42  
43  
44 67 glucose tolerance test.  
45  
46  
47  
48  
49  
50  
51  
52  
53  
54  
55  
56  
57  
58  
59  
60

1  
2  
3 68 **Strengths and limitations of this study**  
4

- 5 69 • One important strength of this study is represented by its prospective design  
6  
7 70 and the enrollment of participants at the time of gestational diabetes diagnosis.  
8  
9  
10 71 • Carotid intima-media thickness was measured in non-sedated neonates by  
11  
12 72 experienced pediatric cardiologists using automated methods with manual  
13  
14 73 tracing adjustment, in accordance with published guidelines.  
15  
16  
17 74 • Limitations of this study include the relatively small sample size, the possibility  
18  
19 75 of residual confounding and the limited generalizability.  
20  
21  
22  
23  
24  
25  
26  
27  
28  
29  
30  
31  
32  
33  
34  
35  
36  
37  
38  
39  
40  
41  
42  
43  
44  
45  
46  
47  
48  
49  
50  
51  
52  
53  
54  
55  
56  
57  
58  
59  
60



## 76 INTRODUCTION

77 Gestational diabetes mellitus (GDM) is a state of hyperglycemia with onset or first  
78 recognition during pregnancy.[1-3] The prevalence of hyperglycemia during pregnancy  
79 has increased in recent decades, being estimated at 16% worldwide in 2019, with 84%  
80 of cases due to GDM.[4] GDM is associated with long-term metabolic consequences  
81 for both the mother and the offspring, such as type 2 diabetes and obesity.[5] Women  
82 with GDM also have subclinical atherosclerosis and an increased risk for  
83 cardiovascular disease (CVD) later in life.[6,7] However, little is known about the  
84 cardiovascular risk of their offspring.

85  
86 CIMT is a surrogate marker of atherosclerosis, which has been shown to be increased  
87 in children exposed to risk factors in the first 1000 days of life, such as poor fetal  
88 growth,[8] as well as in children with type 1 diabetes.[9] From a developmental origins  
89 of health and disease (DOHaD) perspective,[10] exposure to adverse experiences in  
90 early life may produce lifelong adaptations in the organs' structure and function and  
91 may program the risk for CVD. For instance, a systematic review and meta-analysis  
92 showed that GDM was associated with a higher systolic blood pressure in  
93 childhood.[11] Whether GDM has an impact on children's CIMT is not clearly  
94 established. The evidence is scarce notably in the very young children although CIMT  
95 measurement is feasible from birth and could help discern between changes that occur  
96 before or after birth.[12] To fill this gap, we conducted *MySweetHeart Cohort* study to  
97 assess the early life cardiovascular consequences of GDM.[13] Herein, we evaluated  
98 CIMT at birth in offspring of mothers with and without GDM.

100

## 101 **METHODS**

### 102 **Study design and setting**

103 *MySweetHeart Cohort* is a prospective cohort study conducted at the Lausanne  
104 University Hospital (CHUV), Switzerland. The study has been registered with  
105 ClinicalTrials.gov (clinicaltrials.gov/ct2/show/NCT02872974) and the study protocol  
106 has been published.[13] Ethical approval was granted by the Ethics Committee for  
107 Human Research of the Canton de Vaud (study number 2016-00745).

### 109 **Study population**

110 This cohort included pregnant women between 24 and 32 weeks of gestation, with and  
111 without GDM. Other inclusion criteria were age 18 years or more and understanding  
112 French or English. The exclusion criteria were pre-existing diabetes mellitus, strict bed  
113 rest, or severe mental disorders. To facilitate recruitment and share resources, a  
114 collaboration was established with *MySweetHeart Trial*,[14] a randomized controlled  
115 trial assessing the effect of a lifestyle and psychosocial intervention on cardiometabolic  
116 outcomes of women with GDM and their offspring. As such, women with GDM were  
117 invited to contribute to both studies. Participating women with and without GDM were  
118 included in the current analysis if CIMT data for their live-born singleton neonates were  
119 available. All families gave a signed informed consent for use of their data.

### 121 **Data collection**

#### 122 **GDM screening**

123 Pregnant women screened at the prenatal care clinic of the CHUV had a fasting plasma  
124 glucose (FPG) test between 24 and 28 weeks of gestation and GDM was diagnosed if  
125 the test result was  $\geq 5.1$  mmol/L.[13] If FPG was  $< 5.1$  mmol/L, but  $\geq 4.4$  mmol/L,

1  
2  
3 126 women had a 2-hour 75 g oral glucose tolerance test (OGTT) and GDM was diagnosed  
4  
5 127 based on the criteria of the International Association of Diabetes and Pregnancy Study  
6  
7 128 Groups (IADPSG).[15] Pregnant women screened by external obstetricians in the  
8  
9 129 Canton of Vaud underwent the same procedure or directly a 2-hour 75 g OGTT.  
10  
11  
12  
13

130

### 131 Carotid ultrasound and CIMT measurement

132 A carotid ultrasound assessment was performed between 1 and 7 days of life in the  
133 majority of neonates (n=191). A small share (n=9) had the exam between 8 and 19  
134 days of life due to organizational and logistical constraints. Parents were told to feed  
135 and burp their offspring ahead of the carotid ultrasound to make them more relaxed.  
136 Feeding or administration of a 30% glucose solution were used to comfort the neonates  
137 if they became agitated during the exam. The exam took place in a dark and quiet room  
138 and a cloth was placed under the neonates' shoulders to facilitate the extension of the  
139 neck.  
140

141 Ultrasound image acquisition and analysis were performed by 2 experienced pediatric  
142 cardiologists who were blinded to the maternal glycemic status. Images were acquired  
143 in B-mode with no harmonics, sonoCT, dynamic range of 60dB, at a frame rate of 100-  
144 120Hz, with a depth of 1-2 cm. The right and left carotid arteries were scanned using  
145 a Philips EPIC echocardiograph (Philips Medical, Netherlands) with a L 15-7 MHz high-  
146 resolution linear array transducer, according to the American Heart Association's  
147 recommendations for standard assessment of subclinical atherosclerosis in children  
148 and adolescents.[16] Each observer recorded three consecutive 3-second cine loops  
149 from 2 different angles on each side, which were stored as native DICOM for  
150 subsequent offline analyses (QLab, Philips Medical, Netherlands). Whenever image  
151  
152  
153  
154  
155  
156  
157  
158  
159  
160

1  
2  
3 151 quality was optimal enough, 6 right and 6 left frames were selected and, for each, the  
4  
5 152 maximal IMT of the common carotid artery far wall was measured. Measurements were  
6  
7 153 performed over a 1-cm region of interest proximal to the carotid bulb, on or closest to  
8  
9 154 the R-wave of the electrocardiogram, using a semi-automated edge detection software  
10  
11 155 with manual tracing adjustment when needed. The mean of 12 maximal CIMT  
12  
13 156 measurements was used in the analysis for the majority of neonates (n=170). Two  
14  
15 157 neonates had only one measurement available, whereas the rest had between 2 and  
16  
17 158 11 measurements that were averaged. A good interobserver reliability (coefficient of  
18  
19 159 variation=5.9%) for measurements in non-sedated infants was proven in our laboratory  
20  
21  
22 160 previously.[12]  
23  
24  
25  
26 161

#### 27 28 162 Other sample characteristics

29  
30 163 Data on maternal characteristics (age, country of origin, education, smoking during  
31  
32 164 pregnancy, pre-pregnancy weight and height, or parity) and family history of diabetes  
33  
34 165 were record-based or self-reported by the mother at a researcher-administered  
35  
36 166 interview upon inclusion in the study. Smoking during pregnancy was defined as a  
37  
38 167 mother who was an active tobacco smoker at study baseline, i.e., between 24 and 32  
39  
40 168 weeks of gestation. A maternal blood sampling was also performed at baseline and  
41  
42 169 glycated hemoglobin (HbA1c) was measured. Pre-pregnancy body mass index (BMI)  
43  
44 170 was computed by dividing the pre-pregnancy weight (kg) by the squared height (m<sup>2</sup>).  
45  
46 171 Delivery data such as newborn sex, anthropometry, gestational age, or mode of  
47  
48 172 delivery were obtained from the medical records. Neonatal weight, length and blood  
49  
50 173 pressure were measured by the study team at the time of the carotid ultrasound. Body  
51  
52 174 surface area (m<sup>2</sup>) was computed using the Mosteller equation.[17] One systolic and  
53  
54 175 diastolic blood pressure measurement was taken from the right upper arm, in a supine  
55  
56  
57  
58  
59  
60

1  
2  
3 176 position, using a clinically validated and regularly calibrated oscillometric  
4  
5 177 sphygmomanometer (Accutorr Plus; Datascope, Paramus, New Jersey, USA) with  
6  
7  
8 178 neonate cuffs.  
9

10 179

## 12 180 **Data analysis**

14 181 Descriptive statistics on study participants are reported as percentages (%) or as  
15  
16 182 mean, standard deviation, minimum and maximum values. The relationship of GDM  
17  
18 183 with CIMT was evaluated by a set of linear regression models with and without  
19  
20 184 adjustment for potential confounders, i.e., baseline covariates associated with  
21  
22 185 metabolic and cardiovascular risks, offspring's sex, and anthropometry at CIMT  
23  
24 186 assessment. Potential confounders were maternal pre-pregnancy BMI, maternal  
25  
26 187 education (university/no university), smoking during pregnancy (yes/no), and family  
27  
28 188 history of diabetes (yes/no). The variable family history of diabetes summarized  
29  
30 189 disease occurrence in a 1<sup>st</sup> degree relative of the mother, 1<sup>st</sup> degree relative of the  
31  
32 190 father or in the father himself and assumed missing data in any of these variables as  
33  
34 191 no history of diabetes unless values for all 3 variables were missing. To account for  
35  
36 192 differences in body size,[18,19] we adjusted for body surface area and age at CIMT  
37  
38 193 assessment. All statistical analyses were performed in Stata 16 (Stata Corporation,  
39  
40 194 Texas, USA).  
41  
42  
43  
44  
45  
46  
47  
48

195

## 49 196 **RESULTS**

### 51 197 **Characteristics of study participants**

53 198 Data collection started in September 2016 and ended in October 2020. A total of 137  
54  
55 199 participants without GDM exposure and 212 participants with GDM exposure were  
56  
57 200 recruited in the study. Some 101 neonates without GDM exposure and 117 neonates  
58  
59  
60

1  
2  
3 201 with GDM exposure attended the cardiovascular follow-up visit early after birth. Of  
4  
5 202 these, 200 singleton neonates born at more than 36 weeks of gestation (non-GDM:  
6  
7 203 n=99; GDM: n=101) had CIMT measurements and constitute the analytic sample for  
8  
9 204 the current analysis.  
10  
11

12 205

14 206 Family and neonatal characteristics of study participants are presented in Table 1. The  
15  
16 207 maternal characteristics were generally comparable between the non-GDM and GDM  
17  
18 208 groups. The majority of women were non-Swiss and their age ranged from 18 to 47  
19  
20 209 years. Approximately half of the women in each group had a high level of education  
21  
22 210 and no previous deliveries. More women with GDM (16%) were obese (pre-pregnancy  
23  
24 211 BMI  $\geq$  30 kg/m<sup>2</sup>) compared to women without GDM (6%). Smoking during pregnancy  
25  
26 212 was more frequent among women with GDM (18%) than among those without GDM  
27  
28 213 (4%). Offspring of women with and without GDM had similar neonatal characteristics,  
29  
30 214 such as sex, gestational age, birth weight, length, or blood pressure. The majority were  
31  
32 215 born at term, i.e., between 37 and 41 weeks (GDM: 96%; non-GDM: 98%) and a small  
33  
34 216 share had macrosomia, i.e., a birth weight higher than 4'000 g (GDM: 6%; non-GDM:  
35  
36 217 5%). Offspring of women with GDM (46%) had a higher frequency of family history of  
37  
38 218 diabetes compared to their non-GDM counterparts (24%).  
39  
40  
41  
42  
43  
44  
45  
46  
47  
48  
49  
50  
51  
52  
53  
54  
55  
56  
57  
58  
59  
60

219 **Table 1** Characteristics of study participants by GDM exposure.

|                                                         | Non-GDM <sup>a</sup> (n=99) |      |       |       | GDM <sup>b</sup> (n=101) |      |       |       |
|---------------------------------------------------------|-----------------------------|------|-------|-------|--------------------------|------|-------|-------|
|                                                         | mean or %                   | sd   | min   | max   | mean or %                | sd   | min   | max   |
| <b>MATERNAL</b>                                         |                             |      |       |       |                          |      |       |       |
| Age (years)                                             | 33                          | 5    | 18    | 44    | 33                       | 5    | 21    | 47    |
| Swiss origin (%)                                        | 24                          |      |       |       | 33                       |      |       |       |
| University education (%)                                | 60                          |      |       |       | 55                       |      |       |       |
| Primiparous (%)                                         | 55                          |      |       |       | 48                       |      |       |       |
| Smoking during pregnancy (%)                            | 4                           |      |       |       | 18                       |      |       |       |
| Pre-pregnancy obesity (BMI ≥ 30 kg/m <sup>2</sup> ) (%) | 6                           |      |       |       | 16                       |      |       |       |
| HbA1C (%)                                               | 4.9                         | 0.3  | 4.2   | 5.7   | 5.3                      | 0.3  | 4.7   | 7.2   |
| <b>NEONATAL</b>                                         |                             |      |       |       |                          |      |       |       |
| Male (%)                                                | 52                          |      |       |       | 53                       |      |       |       |
| Cesarean section (%)                                    | 22                          |      |       |       | 32                       |      |       |       |
| Term birth (37 to 41 weeks) (%)                         | 98                          |      |       |       | 96                       |      |       |       |
| Birth weight (g)                                        | 3'352                       | 425  | 2'190 | 4'190 | 3'357                    | 442  | 2'220 | 4'340 |
| Macrosomia (Birth weight > 4'000 g) (%)                 | 5                           |      |       |       | 6                        |      |       |       |
| Length (cm)                                             | 50                          | 2    | 45    | 54    | 50                       | 2    | 45    | 56    |
| Body surface area (m <sup>2</sup> )                     | 0.21                        | 0.02 | 0.16  | 0.25  | 0.21                     | 0.02 | 0.17  | 0.26  |
| Systolic BP (mmHg)                                      | 78                          | 9    | 60    | 101   | 78                       | 10   | 60    | 111   |
| Diastolic BP (mmHg)                                     | 47                          | 8    | 30    | 66    | 48                       | 10   | 28    | 90    |
| Family history of diabetes (%)                          | 24                          |      |       |       | 46                       |      |       |       |

Abbreviations: BMI, body mass index; BP, blood pressure; GDM, gestational diabetes mellitus; HbA1c, glycated hemoglobin n, total number of participants; max, maximum; min, minimum; sd, standard deviation.

<sup>a</sup> Non-GDM: Missing values for swiss origin (n=1), university education (n=2), pre-pregnancy obesity (n=1), HbA1c (n=13), cesarean section (n=4), term birth (n=10), systolic BP (n=1), diastolic BP (n=1); family history of diabetes (n=1).

<sup>b</sup> GDM: Missing values for age (n=3), swiss origin (n=3), university education (n=18), primiparous (n=3), smoking (n=5), pre-pregnancy obesity (n=4), HbA1c (n=5), male (n=16), cesarean section (n=6), term birth (n=16), birth weight (n=16); family history of diabetes (n=4).

### 221 **GDM and CIMT at birth**

222 The distribution of CIMT values is presented in Fig. 1, Fig. 2, and Fig. S2 in  
223 Supplementary Material. CIMT ranged from 0.21 to 0.42 mm, with a mean CIMT of  
224 0.30 mm (sd 0.04) overall and in each of the studied groups (Table 2, Table S1 in  
225 Supplementary Material).

227 **Fig. 1** Histograms of CIMT at birth, overall and by GDM exposure.

228 **Figure legend** This figure shows the distribution of CIMT values in our sample, overall  
229 (n=200) and by GDM exposure (Non-GDM: n=99; GDM: n=101). The black line  
230 represents the kernel density estimate. Abbreviations: CIMT, carotid intima-media  
231 thickness; GDM, gestational diabetes mellitus.

233 **Fig. 2** Box plots of CIMT at birth by GDM exposure and assignment to a lifestyle and  
234 psychosocial intervention.

235 **Figure legend** This figure shows the distribution of CIMT in the offspring of women  
236 without GDM (*Non-GDM*; n=99) and the offspring of women with GDM who were  
237 assigned to no intervention (*GDM, non-I*; n=48) or to a lifestyle and psychosocial  
238 intervention (*GDM, I*; n=53) as part of their participation in the *MySweetHeart* Trial. The  
239 line inside the box represents the median value of the distribution, while the lower and  
240 upper boundaries of the box represent the first (Q1) and third quartiles (Q3),  
241 respectively. The interquartile range (IQR) corresponds to  $Q3 - Q1$ . The whiskers  
242 extend from either side of the box up to  $1.5 \cdot IQR$  (i.e.,  $Q1 - 1.5 \cdot IQR$  and  $Q3 + 1.5 \cdot IQR$ ).  
243 Outliers are depicted as circles. Abbreviations: CIMT, carotid intima-media thickness;  
244 GDM, gestational diabetes mellitus; I, intervention.



245 **Table 2** The relationship of GDM with offspring's CIMT at birth.

|         | Mean (SD), mm | Model 1 (n=200)              |      | Model 2 (n=165)              |      | Model 3 (n=165)              |      |
|---------|---------------|------------------------------|------|------------------------------|------|------------------------------|------|
|         |               | Mean difference (95% CI), mm | p    | Mean difference (95% CI), mm | p    | Mean difference (95% CI), mm | p    |
| Non-GDM | 0.30 (0.04)   | ref                          | ref  | ref                          | ref  | ref                          | ref  |
| GDM     | 0.30 (0.04)   | 0.00 (-0.01 to 0.01)         | 0.96 | 0.00 (-0.02 to 0.01)         | 0.47 | 0.00 (-0.02 to 0.01)         | 0.45 |

Estimates were obtained from linear regression models with the following specification: Model 1: unadjusted estimates; Model 2: estimates adjusted for maternal pre-pregnancy BMI, education, and tobacco smoking; offspring family history of diabetes and sex; Model 3: estimates adjusted for maternal pre-pregnancy BMI, education, and tobacco smoking; offspring family history of diabetes, sex, body surface area and age at CIMT assessment. The outcome variable (i.e., CIMT) was continuous. The exposure variable was binary (GDM/Non-GDM; the reference category was Non-GDM). Similar results were obtained when Model 1 was run in the sample (n=165) with data on outcome, exposure, and all covariates included in Models 2 and 3 (GDM: 0.00 mm (95% CI: -0.02 to 0.01; p=0.54)). Abbreviations: CI, confidence interval; CIMT, carotid intima-media thickness; GDM, gestational diabetes mellitus; n, total number of participants; p, p-value; sd, standard deviation; ref, reference group.

1  
2  
3 247 The relationship of GDM with offspring's CIMT early after birth is presented in Table 2  
4  
5 248 and Fig. 3. In the unadjusted analysis (Model 1), the difference in CIMT between  
6  
7 249 offspring of women with and without GDM was 0.00 mm (95% CI -0.01 to 0.01; p=0.96).  
8  
9  
10 250 Adjustment for offspring sex and potential confounding factors (Model 2), as well as for  
11  
12 251 offspring's body surface area and age at CIMT assessment (Model 3), resulted in a  
13  
14 252 difference of 0 mm (95% CI -0.02 to 0.01; p=0.45). When exposure to GDM was  
15  
16  
17 253 analyzed separately for offspring whose mothers were assigned or not to a lifestyle  
18  
19 254 and psychosocial intervention as part of their participation in *MySweetHeart* Trial,  
20  
21 255 results were similar to those presented above (Table S1 and Fig. S1 in Supplementary  
22  
23  
24 256 Material).

257

258 **Fig 3** Illustration of the relationship of GDM with offspring's CIMT at birth through a  
259 forest plot.

260 **Figure legend** The boxes represent the mean differences in CIMT between offspring  
261 of women with and without GDM (i.e., GDM versus non-GDM). The horizontal lines  
262 represent the 95% CIs. The plot was constructed using regression estimates and  
263 models presented in Table 2. Model specification: Model 1 is unadjusted, while Models  
264 2 and 3 are adjusted for various factors as described in the methods and footnote of  
265 Table 2. Abbreviations: CI, confidence interval; CIMT, carotid intima-media thickness;  
266 GDM, gestational diabetes mellitus.

267

## 268 **DISCUSSION**

### 269 **Summary of findings and comparison with other studies**

270 Our goal was to assess the relationship of GDM with neonatal CIMT. We found no  
271 evidence of an increased CIMT in neonates born to women with GDM as compared to

1  
2  
3 272 those born to women without GDM. Our findings are in line with other studies that  
4  
5 273 evaluated CIMT after intrauterine exposure to maternal hyperglycemia. A recent meta-  
6  
7 274 analysis pooled data from 3 studies and reported no clear evidence of increased CIMT  
8  
9  
10 275 in children exposed to maternal hyperglycemia compared to those not exposed (pooled  
11  
12 276 standardized mean difference (SMD): 0.08 (95% CI -0.16 to 0.33)).[8] Two of these  
13  
14 277 studies included 6-year and 8-year children, respectively, and found no difference in  
15  
16  
17 278 CIMT after exposure to GDM (SMD 0.00 (95% CI -0.28 to 0.28) at 6 years and 0.00  
18  
19 279 (95% CI -0.41 to 0.41) at 8 years).[8,20,21] The third study included neonates and  
20  
21 280 found a slightly higher CIMT among those exposed to diabetes (SMD 0.46 (95% CI -  
22  
23 281 0.07 to 1.00)),[8,22] but the imprecision around the estimated difference was high, the  
24  
25 282 study had a very small sample size (n=55) and the authors did not specify whether  
26  
27  
28 283 they included women with pre-gestational or gestational diabetes.[22]  
29  
30  
31 284

### 32 33 285 **Strengths and limitations**

34  
35 286 A major strength of this study is its prospective design. Enrollment of study participants  
36  
37 287 and collection of baseline characteristics took place close to the moment of GDM  
38  
39  
40 288 diagnosis and ahead of the CIMT outcome assessment. This implies that the choice of  
41  
42 289 participation in the study is unlikely to be related to both the exposure and the outcome,  
43  
44 290 which makes selection bias due to enrollment unlikely. Further, GDM was diagnosed  
45  
46  
47 291 using the new criteria of the IADPG. These criteria were derived based on the risk of  
48  
49 292 adverse neonatal outcomes, such as birth weight, cord blood C-peptide levels, or  
50  
51 293 percent infant body fat > 90th percentile.[15] They were endorsed by the World Health  
52  
53 294 Organization along with several other bodies to achieve a universal consensus for  
54  
55  
56 295 GDM diagnosis and increase comparability of the evidence.[23,24] Another strength is  
57  
58 296 the assessment of ultrasound CIMT using automated methods with manual tracing  
59  
60

1  
2  
3 297 adjustment, in accordance with the current guidelines in children.[16,25] The semi-  
4  
5 298 automated methods are associated with a lower interoperator variability and high  
6  
7 299 reliability,[16,25] including in infants, as it was previously proved in our laboratory.[12]  
8  
9  
10 300  
11  
12 301 This study has some limitations. Firstly, our results have limited generalizability, as we  
13  
14 302 used a convenient sample of pregnant women recruited from health care facilities in  
15  
16 303 Switzerland. Secondly, the GDM glucose screening test (FPG or 75-g OGTT) varied  
17  
18 304 between participants. This is because our hospital used a 2-step targeted approach for  
19  
20 305 identifying women with GDM. While the 2-step approach is practical and more  
21  
22 306 acceptable to patients,[26] it may be related to a lower likelihood of diagnosing GDM  
23  
24 307 compared to a one-step universal screening based on a 75-g OGTT.[27] On the other  
25  
26 308 hand, the IADGSP criteria, which have a lower threshold for a positive FPG test ( $\geq 5.1$   
27  
28 309 mmol/L) compared to other guidelines,[23] may identify as having GDM women who  
29  
30 310 are at low absolute risk for fetal and pregnancy complications and, thus, overdiagnose  
31  
32 311 GDM in some populations.[28,29] Therefore, misclassification of the exposure cannot  
33  
34 312 be excluded and our estimates of association might be biased, maybe underestimated.  
35  
36 313 Additionally, women with GDM participated in *MySweetHeart* Trial and approximately  
37  
38 314 half of them were assigned to a lifestyle and psychosocial intervention with the aim of  
39  
40 315 improving their cardiometabolic outcomes. Although this intervention could have also  
41  
42 316 modified the association of GDM with CIMT, this seems not likely, as mean CIMT  
43  
44 317 values were very similar in offspring of women with GDM who participated in the  
45  
46 318 intervention and the control arms of the trial. Thirdly, CIMT was assessed using  
47  
48 319 conventional high-resolution ultrasound frequencies ( $< 15$  MHz), which have a lower  
49  
50 320 spatial resolution and, thus, tend to overestimate the arterial thickness in the young  
51  
52 321 children when compared to very high-resolution ultrasound systems (25 to 55  
53  
54  
55  
56  
57  
58  
59  
60

1  
2  
3 322 MHz).[30,31] Measurement error in CIMT cannot be excluded, but systematic  
4  
5 323 differences between the two groups are unlikely because the outcome assessors were  
6  
7 324 blinded to the glycemc status of the mothers. Fourthly, while we adjusted for key  
8  
9 325 confounders at the analysis stage, there is a possibility of bias due to unmeasured  
10  
11 326 factors, such as family history of premature cardiovascular death, or residual  
12  
13 327 confounding due to the relatively small sample size and imprecision in the  
14  
15 328 measurement of confounder variables, especially in those self-reported. Lastly, our  
16  
17 329 study was limited to CIMT, which is a measure of arterial structure. In fact, changes in  
18  
19 330 the vessel function might occur earlier than changes in the vessel structure, therefore,  
20  
21 331 a combination of vascular measures would be needed for a clearer view on the  
22  
23 332 cardiovascular status of children exposed to adverse experiences in early life.  
24  
25 333 However, certain techniques to assess arterial function and stiffness, such as flow-  
26  
27 334 mediated dilation and pulse-wave velocity, are not currently feasible in the very young  
28  
29 335 due to limited compliance and technical inconveniences.[18]  
30  
31  
32  
33  
34  
35  
36  
37  
38  
39

### 337 **Implications and future research**

40 338 Our results suggest that intrauterine exposure to GDM does not induce changes in the  
41  
42 339 carotid artery structure that are detectable with conventional ultrasound techniques at  
43  
44 340 birth and may not be linked to early vascular aging at this arterial site in the short term.  
45  
46 341 Measurements at other arterial sites, such as the aorta,[32] may be more useful to  
47  
48 342 investigate early or subtle abnormalities related to accelerated vascular aging or  
49  
50 343 subclinical atherosclerosis. A long-term follow-up that includes complementary  
51  
52 344 vascular measures, for instance, endothelium-dependent and endothelium-  
53  
54 345 independent vasodilation or large-artery stiffness,[20] may shed further light on the  
55  
56 346 cardiovascular health of children born to mothers with GDM.  
57  
58  
59  
60

347

**348 Patient and public involvement**

349 There was no patient or public involvement in the design, conduct, analysis, or  
350 reporting of this study's findings.

351

**352 Author affiliations**

353 <sup>1</sup>Population Health Laboratory (#PopHealthLab), University of Fribourg, Fribourg,  
354 Switzerland;

355 <sup>2</sup>Department of Epidemiology and Health Services, Center for Primary Care and Public  
356 Health (UNISANTÉ), University of Lausanne, Lausanne, Switzerland;

357 <sup>3</sup>Paediatric Cardiology Unit, Woman-Mother-Child Department, Lausanne University  
358 Hospital (CHUV), Lausanne, Switzerland;

359 <sup>4</sup>Institute of Primary Health Care (BIHAM), University of Bern, Bern, Switzerland;

360 <sup>5</sup>School of Global and Population Health, McGill University, Montréal, Canada

361

**362 Authors' contributions**

363 AC, NS, SDB, and YM designed the study and the data collection procedures with  
364 input from SEY, AME. SEY and AME collected baseline characteristics for participants  
365 without GDM. SDB and NS collected neonatal cardiovascular characteristics for all  
366 participants. SEY performed data management and curation. AME carried out the  
367 statistical analyses with input and supervision from AC. AME wrote the first draft of the  
368 manuscript with input from AC and NS. SDB, SEY, YM made critical revisions to the  
369 manuscript for important intellectual content. All authors read and approved the content  
370 of the manuscript.

371

## 372 **Acknowledgements**

373 The study teams of *MySweetHeart* Cohort and *MySweetHeart* Trial form  
374 *MySweetHeart* Research group and collaborated on data collection, management, and  
375 curation. We thank the following members of *MySweetHeart* Research Group, listed in  
376 alphabetical order: Amar Arhab, Pascal Bovet, Arnaud Chiolero, Stefano Di Bernardo,  
377 Adina Mihaela Epure, Sandrine Estoppey Younes, Leah Gilbert, Justine Gross, Antje  
378 Horsch, Stefano Lanzi, Seyda Mayerat, Yvan Mivelaz, Jardena J. Puder, Dan  
379 Quansah, Jean-Benoit Rossel, Nicole Sekarski, Umberto Simeoni, Bobby Stuijzand,  
380 Yvan Vial.

## 382 **Funding**

383 This study was funded by the Swiss National Science Foundation ([www.snf.ch](http://www.snf.ch);  
384 *MySweetHeart* Cohort project number 32003B-163240; *MySweetHeart* Trial project  
385 number 32003B\_176119). The funder had no role in the study design, data collection  
386 and analysis, or interpretation of results.

## 388 **Competing interests**

389 None declared.

## 391 **Consent for publication**

392 Not applicable.

## 394 **Ethics approval**

395 Ethical approval was obtained through the Ethics Committee for Human Research of  
396 the Canton of Vaud (2016–00745).

1  
2  
3 397  
4  
5  
6 398 **Data availability statement**  
7  
8 399 Data could be made available by the principal investigator and corresponding author  
9  
10 400 (Prof Nicole Sekarski: [nicole.sekarski@chuv.ch](mailto:nicole.sekarski@chuv.ch)) on reasonable request.  
11  
12 401  
13  
14  
15  
16  
17  
18  
19  
20  
21  
22  
23  
24  
25  
26  
27  
28  
29  
30  
31  
32  
33  
34  
35  
36  
37  
38  
39  
40  
41  
42  
43  
44  
45  
46  
47  
48  
49  
50  
51  
52  
53  
54  
55  
56  
57  
58  
59  
60

For peer review only



402 **REFERENCES**

- 403 1. Reece EA, Leguizamon G, Wiznitzer A. Gestational diabetes: the need for a  
404 common ground. *Lancet* 2009;373(9677):1789-97. doi: 10.1016/s0140-  
405 6736(09)60515-8.
- 406 2. Reece EA. The fetal and maternal consequences of gestational diabetes mellitus. *J*  
407 *Matern Fetal Neonatal Med* 2010;23(3):199-203. doi:  
408 10.3109/14767050903550659.
- 409 3. American Diabetes Association (ADA). 2. Classification and Diagnosis of Diabetes:  
410 Standards of Medical Care in Diabetes—2021. *Diabetes Care*  
411 2021;44(Supplement 1):S15-S33. doi: 10.2337/dc21-S002.
- 412 4. International Diabetes Federation. IDF Diabetes Atlas. 9th edition. Brussels,  
413 Belgium: International Diabetes Federation, 2019.
- 414 5. Damm P, Houshmand-Oeregaard A, Kelstrup L, et al. Gestational diabetes mellitus  
415 and long-term consequences for mother and offspring: a view from Denmark.  
416 *Diabetologia* 2016;59(7):1396-99. doi: 10.1007/s00125-016-3985-5.
- 417 6. Li JW, He SY, Liu P, et al. Association of gestational diabetes mellitus (GDM) with  
418 subclinical atherosclerosis: a systemic review and meta-analysis. *BMC*  
419 *Cardiovasc Disord* 2014;14:132. doi: 10.1186/1471-2261-14-132.
- 420 7. Tobias DK, Stuart JJ, Li S, et al. Association of History of Gestational Diabetes With  
421 Long-term Cardiovascular Disease Risk in a Large Prospective Cohort of US  
422 Women. *JAMA Intern Med* 2017;177(12):1735-42. doi:  
423 10.1001/jamainternmed.2017.2790.
- 424 8. Epure AM, Rios-Leyvraz M, Anker D, et al. Risk factors during first 1,000 days of life  
425 for carotid intima-media thickness in infants, children, and adolescents: A

- 1  
2  
3 426 systematic review with meta-analyses. *PLoS Med* 2020;17(11):e1003414. doi:  
4  
5 427 10.1371/journal.pmed.1003414.  
6  
7  
8 428 9. Giannopoulou EZ, Doundoulakis I, Antza C, et al. Subclinical arterial damage in  
9  
10 429 children and adolescents with type 1 diabetes: A systematic review and meta-  
11  
12 430 analysis. *Pediatr Diabetes* 2019;20(6):668-77. doi: 10.1111/pedi.12874.  
13  
14  
15 431 10. Hanson MA, Gluckman PD. Early developmental conditioning of later health and  
16  
17 432 disease: physiology or pathophysiology? *Physiol Rev* 2014;94(4):1027-76. doi:  
18  
19 433 10.1152/physrev.00029.2013.  
20  
21  
22 434 11. Aceti A, Santhakumaran S, Logan KM, et al. The diabetic pregnancy and offspring  
23  
24 435 blood pressure in childhood: a systematic review and meta-analysis.  
25  
26 436 *Diabetologia* 2012;55(11):3114-27. doi: 10.1007/s00125-012-2689-8.  
27  
28  
29 437 12. Mivelaz Y, Di Bernardo S, Boulos Ksontini T, et al. Feasibility and reliability of  
30  
31 438 carotid intima-media thickness measurements in nonsedated infants. *J*  
32  
33 439 *Hypertens* 2016;34(11):2227-32. doi: 10.1097/hjh.0000000000001065.  
34  
35  
36 440 13. Di Bernardo S, Mivelaz Y, Epure AM, et al. Assessing the consequences of  
37  
38 441 gestational diabetes mellitus on offspring's cardiovascular health:  
39  
40 442 MySweetHeart Cohort study protocol, Switzerland. *BMJ Open*  
41  
42 443 2017;7(11):e016972. doi: 10.1136/bmjopen-2017-016972.  
43  
44  
45 444 14. Horsch A, Gilbert L, Lanzi S, et al. Improving cardiometabolic and mental health in  
46  
47 445 women with gestational diabetes mellitus and their offspring: study protocol for  
48  
49 446 MySweetHeart Trial, a randomised controlled trial. *BMJ Open*  
50  
51 447 2018;8(2):e020462. doi: 10.1136/bmjopen-2017-020462.  
52  
53  
54 448 15. Metzger BE, Gabbe SG, Persson B, et al. International association of diabetes and  
55  
56 449 pregnancy study groups recommendations on the diagnosis and classification  
57  
58  
59  
60

- 1  
2  
3 450 of hyperglycemia in pregnancy. *Diabetes Care* 2010;33(3):676-82. doi:  
4  
5 451 10.2337/dc09-1848.  
6  
7  
8 452 16. Urbina EM, Williams RV, Alpert BS, et al. Noninvasive assessment of subclinical  
9  
10 453 atherosclerosis in children and adolescents: recommendations for standard  
11  
12 454 assessment for clinical research: a scientific statement from the American Heart  
13  
14 455 Association. *Hypertension* 2009;54(5):919-50. doi:  
15  
16 456 10.1161/hypertensionaha.109.192639.  
17  
18  
19 457 17. Mosteller RD. Simplified calculation of body-surface area. *N Engl J Med*  
20  
21 458 1987;317(17):1098. doi: 10.1056/nejm198710223171717.  
22  
23  
24 459 18. Torigoe T, Dallaire F, Slorach C, et al. New Comprehensive Reference Values for  
25  
26 460 Arterial Vascular Parameters in Children. *J Am Soc Echocardiogr* 2020 doi:  
27  
28 461 10.1016/j.echo.2020.03.001.  
29  
30  
31 462 19. Sarkola T, Manlihot C, Slorach C, et al. Evolution of the arterial structure and  
32  
33 463 function from infancy to adolescence is related to anthropometric and blood  
34  
35 464 pressure changes. *Circulation* 2012;126(21).  
36  
37  
38 465 20. Sundholm JKM, Litwin L, Rönö K, et al. Maternal obesity and gestational diabetes:  
39  
40 466 Impact on arterial wall layer thickness and stiffness in early childhood - RADIEL  
41  
42 467 study six-year follow-up. *Atherosclerosis* 2019 doi:  
43  
44 468 10.1016/j.atherosclerosis.2019.01.037.  
45  
46  
47 469 21. Ayer JG, Harmer JA, Nakhla S, et al. HDL-cholesterol, blood pressure, and  
48  
49 470 asymmetric dimethylarginine are significantly associated with arterial wall  
50  
51 471 thickness in children. *Arterioscler Thromb Vasc Biol* 2009;29(6):943-49. doi:  
52  
53 472 10.1161/ATVBAHA.109.184184.  
54  
55  
56  
57  
58  
59  
60

- 1  
2  
3 473 22. Atabek ME, Çağan HH, Eklioğlu BS, et al. Absence of increase in carotid artery  
4  
5 474 Intima-Media thickness in infants of diabetic mothers. *J Clin Res Pediatr*  
6  
7 475 *Endocrinol* 2011;3(3):144-48. doi: 10.4274/jcrpe.v3i3.28.  
8  
9  
10 476 23. World Health Organization. Diagnostic criteria and classification of hyperglycaemia  
11  
12 477 first detected in pregnancy: a World Health Organization Guideline. *Diabetes*  
13  
14 478 *Res Clin Pract* 2014;103(3):341-63. doi: 10.1016/j.diabres.2013.10.012.  
15  
16  
17 479 24. Yuen L, Saeedi P, Riaz M, et al. Projections of the prevalence of hyperglycaemia  
18  
19 480 in pregnancy in 2019 and beyond: Results from the International Diabetes  
20  
21 481 Federation Diabetes Atlas, 9th edition. *Diabetes Res Clin Pract*  
22  
23 482 2019;157:107841. doi: 10.1016/j.diabres.2019.107841.  
24  
25  
26 483 25. Dalla Pozza R, Ehringer-Schetitska D, Fritsch P, et al. Intima media thickness  
27  
28 484 measurement in children: A statement from the Association for European  
29  
30 485 Paediatric Cardiology (AEPIC) Working Group on Cardiovascular Prevention  
31  
32 486 endorsed by the Association for European Paediatric Cardiology.  
33  
34 487 *Atherosclerosis* 2015;238(2):380-7. doi:  
35  
36 488 10.1016/j.atherosclerosis.2014.12.029.  
37  
38  
39  
40 489 26. Agarwal MM, Dhatt GS, Shah SM. Gestational Diabetes Mellitus: Simplifying the  
41  
42 490 International Association of Diabetes and Pregnancy diagnostic algorithm using  
43  
44 491 fasting plasma glucose. *Diabetes Care* 2010;33(9):2018. doi: 10.2337/dc10-  
45  
46 492 0572.  
47  
48  
49 493 27. Mahdavian M, Hivert M-F, Baillargeon J-P, et al. Gestational Diabetes Mellitus:  
50  
51 494 Simplifying the International Association of Diabetes and Pregnancy Diagnostic  
52  
53 495 Algorithm Using Fasting Plasma Glucose. Comment on Agarwal, Dhatt, and  
54  
55 496 Shah. *Diabetes Care* 2010;33(11):e145. doi: 10.2337/dc10-1454.  
56  
57  
58  
59  
60

- 1  
2  
3 497 28. McIntyre HD, Jensen DM, Jensen RC, et al. Gestational Diabetes Mellitus: Does  
4  
5 498 One Size Fit All? A Challenge to Uniform Worldwide Diagnostic Thresholds.  
6  
7 499 *Diabetes Care* 2018;41(7):1339-42. doi: 10.2337/dc17-2393.  
8  
9  
10 500 29. Brodersen J, Schwartz LM, Heneghan C, et al. Overdiagnosis: what it is and what  
11  
12 501 it isn't. *BMJ Evidence-Based Medicine* 2018;23(1):1. doi: 10.1136/ebmed-2017-  
13  
14 502 110886.  
15  
16  
17 503 30. Olander RFW, Sundholm JKM, Ojala TH, et al. Neonatal Arterial Morphology Is  
18  
19 504 Related to Body Size in Abnormal Human Fetal Growth. *Circ Cardiovasc*  
20  
21 505 *Imaging* 2016;9(9) doi: 10.1161/CIRCIMAGING.116.004657.  
22  
23  
24 506 31. Sarkola T, Slorach C, Hui W, et al. Transcutaneous very-high resolution ultrasound  
25  
26 507 for the quantification of carotid arterial intima-media thickness in children -  
27  
28 508 feasibility and comparison with conventional high resolution vascular ultrasound  
29  
30 509 imaging. *Atherosclerosis* 2012;224(1):102-7. doi:  
31  
32 510 10.1016/j.atherosclerosis.2012.06.054.  
33  
34  
35 511 32. Koklu E, Akcakus M, Kurtoglu S, et al. Aortic intima-media thickness and lipid  
36  
37 512 profile in macrosomic newborns. *Eur J Pediatr* 2007;166(4):333-8. doi:  
38  
39 513 10.1007/s00431-006-0243-8.  
40  
41  
42  
43 514  
44  
45  
46  
47  
48  
49  
50  
51  
52  
53  
54  
55  
56  
57  
58  
59  
60

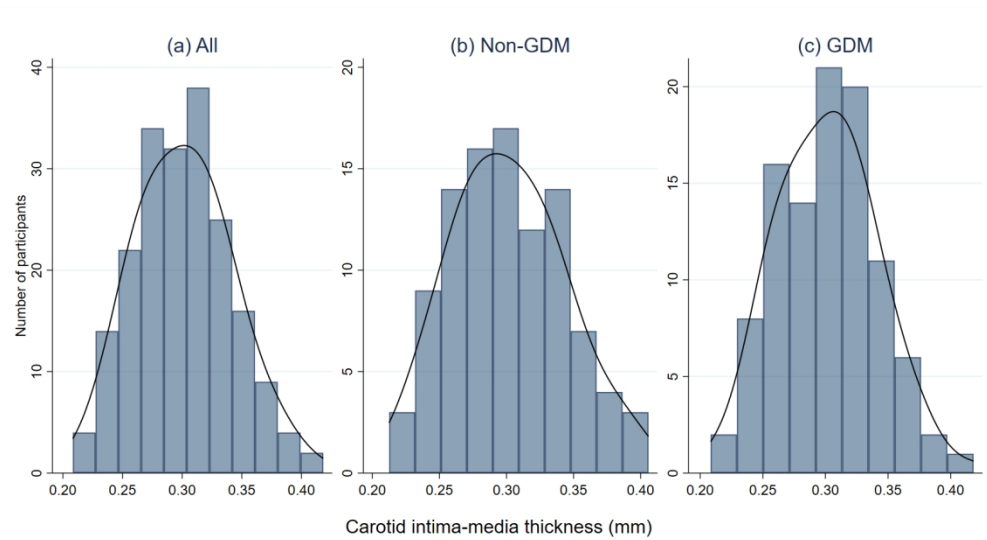

This figure shows the distribution of CIMT values in our sample, overall (n=200) and by GDM exposure (Non-GDM: n=99; GDM: n=101). The black line represents the kernel density estimate. Abbreviations: CIMT, carotid intima-media thickness; GDM, gestational diabetes mellitus.

599x326mm (72 x 72 DPI)

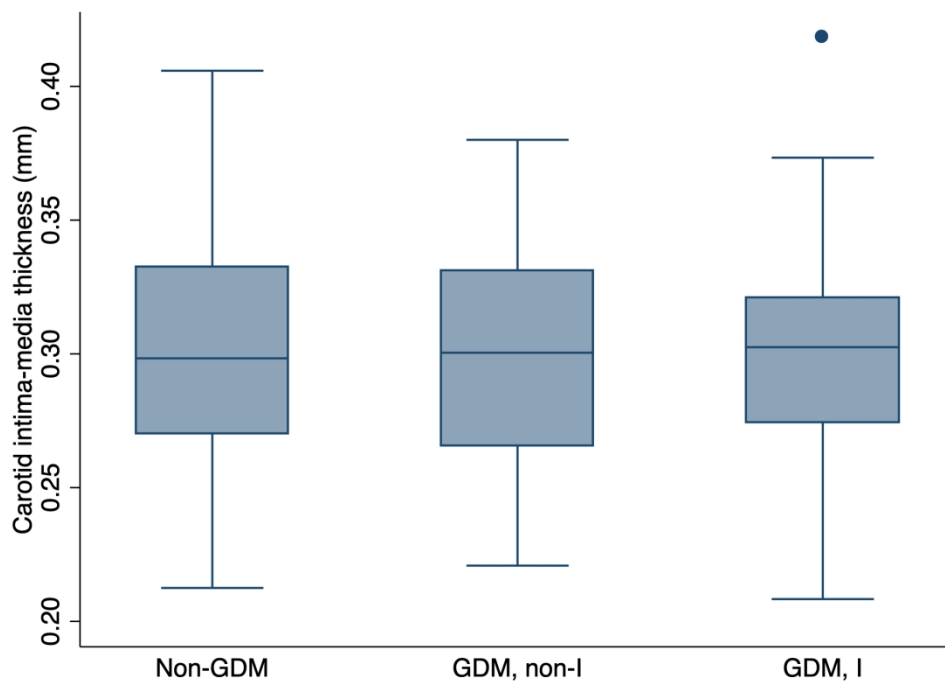

This figure shows the distribution of CIMT in the offspring of women without GDM (Non-GDM; n=99) and the offspring of women with GDM who were assigned to no intervention (GDM, non-I; n=48) or to a lifestyle and psychosocial intervention (GDM, I; n=53) as part of their participation in the MySweetHeart Trial. The line inside the box represents the median value of the distribution, while the lower and upper boundaries of the box represent the first (Q1) and third quartiles (Q3), respectively. The interquartile range (IQR) corresponds to  $Q3 - Q1$ . The whiskers extend from either side of the box up to  $1.5 \times \text{IQR}$  (i.e.,  $Q1 - 1.5 \times \text{IQR}$  and  $Q3 + 1.5 \times \text{IQR}$ ).

378x275mm (144 x 144 DPI)

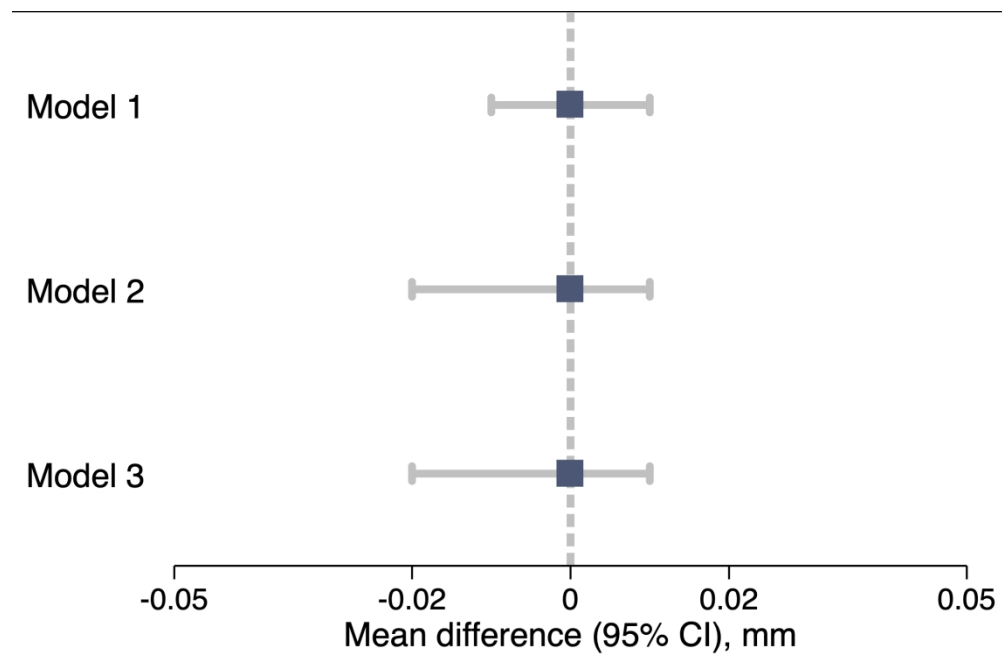

The boxes represent the mean differences in CIMT between offspring of women with and without GDM (i.e., GDM versus non-GDM). The horizontal lines represent the 95% CIs. The plot was constructed using regression estimates and models presented in Table 2. Model specification: Model 1 is unadjusted, while Models 2 and 3 are adjusted for various factors as described in the methods and footnote of Table 2. Abbreviations: CI, confidence interval; CIMT, carotid intima-media thickness; GDM, gestational diabetes mellitus.

423x275mm (144 x 144 DPI)



## SUPPLEMENTARY MATERIAL

### **Gestational diabetes mellitus and offspring's carotid intima-media thickness at birth: *MySweetHeart* Cohort Study**

Adina Mihaela Epure<sup>1,2</sup>, Stefano Di Bernardo<sup>3</sup>, Yvan Mivelaz<sup>3</sup>, Sandrine Estoppey Younes<sup>2</sup>, Arnaud Chiolero<sup>1,4,5¶</sup>, Nicole Sekarski<sup>3¶</sup>,  
on behalf of *MySweetHeart* Research Group

<sup>1</sup>Population Health Laboratory (#PopHealthLab), University of Fribourg, Fribourg, Switzerland;

<sup>2</sup>Department of Epidemiology and Health Services, Center for Primary Care and Public Health (UNISANTÉ), University of Lausanne, Lausanne, Switzerland;

<sup>3</sup>Paediatric Cardiology Unit, Woman-Mother-Child Department, Lausanne University Hospital (CHUV), Lausanne, Switzerland;

<sup>4</sup>Institute of Primary Health Care (BIHAM), University of Bern, Bern, Switzerland;

<sup>5</sup>School of Global and Population Health, McGill University, Montréal, Canada

¶ These authors contributed equally to this work.

**Table S1** The relationship of GDM and assignment or not to a lifestyle and psychosocial intervention with offspring’s CIMT at birth.

|            | Mean (sd), mm | Model 1 (n=200)              |      | Model 2 (n=165)              |      | Model 3 (n=165)              |      |
|------------|---------------|------------------------------|------|------------------------------|------|------------------------------|------|
|            |               | Mean difference (95% CI), mm | p    | Mean difference (95% CI), mm | p    | Mean difference (95% CI), mm | p    |
| Non-GDM    | 0.30 (0.04)   | ref                          | ref  | ref                          | ref  | ref                          | ref  |
| GDM, non-I | 0.30 (0.04)   | 0.00 (-0.01 to 0.01)         | 0.94 | 0.00 (-0.02 to 0.02)         | 0.93 | 0.00 (-0.02 to 0.01)         | 0.91 |
| GDM, I     | 0.30 (0.04)   | 0.00 (-0.01 to 0.01)         | 0.98 | -0.01 (-0.03 to 0.01)        | 0.19 | -0.01 (-0.02 to 0.01)        | 0.25 |

Estimates were obtained from linear regression models with the following specification: Model 1: unadjusted estimates; Model 2: estimates adjusted for maternal pre-pregnancy BMI, education, and tobacco smoking; offspring family history of diabetes and sex; Model 3: estimates adjusted for maternal pre-pregnancy BMI, education, and tobacco smoking; offspring family history of diabetes, sex, body surface area and age at CIMT assessment. The outcome variable (i.e., CIMT) was continuous. The exposure variable was categorical with 3 levels (Non-GDM/ GDM, non-I/ GDM, I; the reference category was Non-GDM). Similar results were obtained when Model 1 was run in the sample (n=165) with data on outcome, exposure, and all covariates included in Models 2 and 3 (GDM, non-I: 0.00 mm (95% CI: -0.01 to 0.01; p=0.99); GDM, I: -0.01 mm (95% CI: -0.02 to 0.01; p=0.29)). Abbreviations: CI, confidence interval; CIMT, carotid intima-media thickness; GDM, gestational diabetes mellitus; I, intervention; n, total number of participants; p, p-value; sd, standard deviation; ref, reference group.

**Fig. S1** Illustration of the relationship of GDM and assignment or not to a lifestyle and psychosocial intervention with offspring's CIMT through a forest plot.

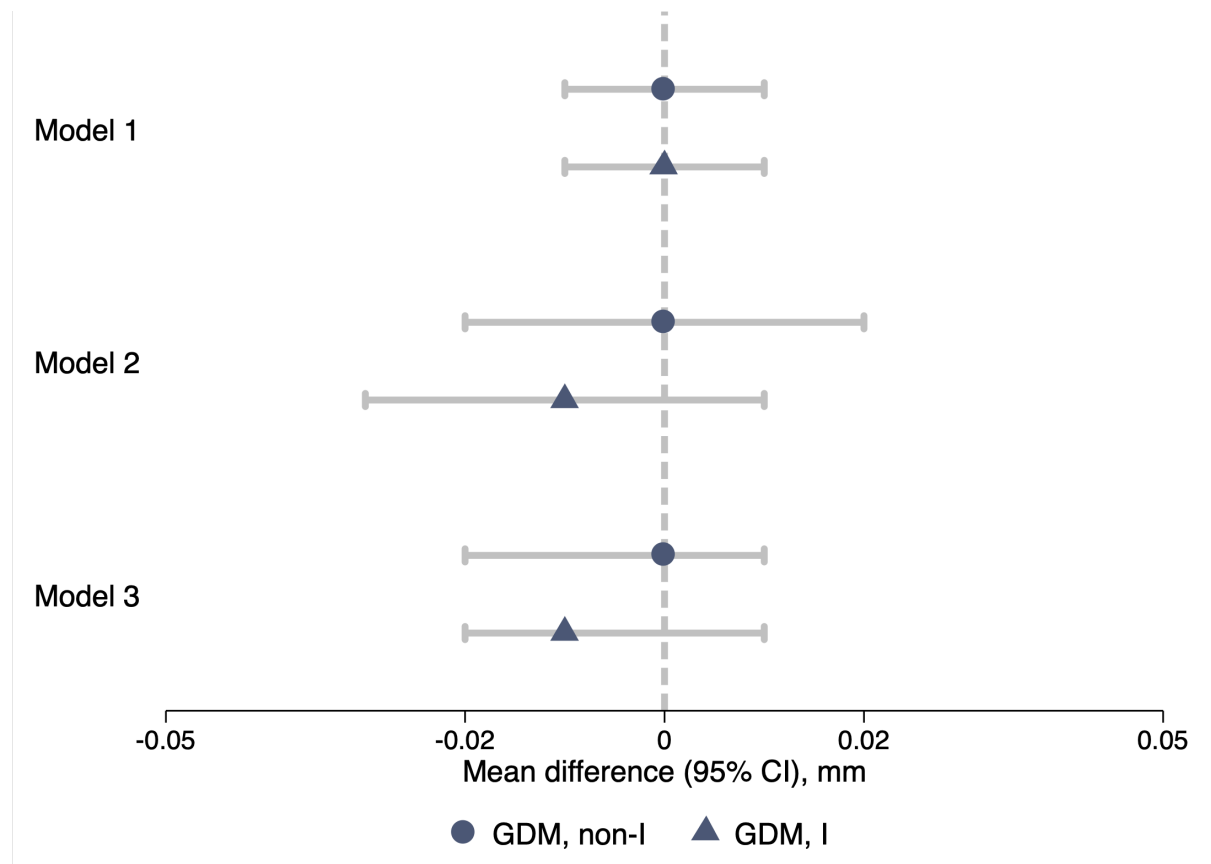

**Figure legend** The circles represent mean differences in CIMT between offspring of women with GDM assigned to no intervention (*GDM, non-I*) and offspring of women without GDM (*Non-GDM*). The triangles represent mean differences in CIMT between offspring of women with GDM assigned to a lifestyle and psychosocial intervention (*GDM, I*) and offspring of women without GDM (*Non-GDM*). The horizontal lines represent the 95% CIs. The plot was constructed using regression estimates and models presented in Table S1. Model specification: Model 1 is unadjusted, while Models 2 and 3 are adjusted for various factors as described in the methods and footnote of Table S1. Abbreviations: CI, confidence interval; CIMT, carotid intima-media thickness; GDM, gestational diabetes; I, intervention.

**Fig. S2** Dot plot of CIMT at birth by gestational diabetes mellitus (GDM) and assignment to a lifestyle and psychosocial intervention (I).

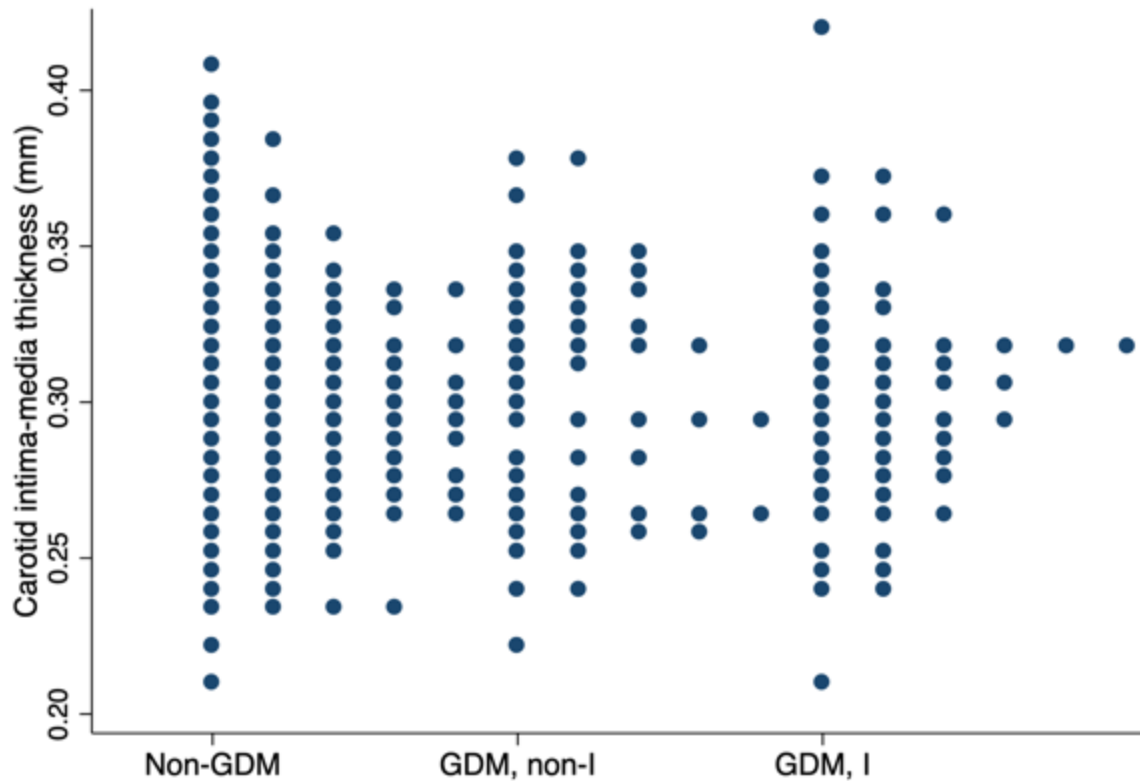

**Figure legend** This figure shows the distribution of CIMT in the offspring of women without GDM (*Non-GDM*) and the offspring of women with GDM who were assigned to no intervention (*GDM, non-I*) or to a lifestyle and psychosocial intervention (*GDM, I*) as part of their participation in the *MySweetHeart* Trial. Abbreviations: CIMT, carotid intima-media thickness; GDM, gestational diabetes mellitus; I, intervention.
